**Running Title:** Roles for OsbZIP47 in rice meristem maintenance

**Corresponding author:** Usha Vijayraghavan

Department of Microbiology and Cell Biology

Indian Institute of Science

Bangalore 560012

India

Email: [uvr@iisc.ac.in](mailto:uvr@iisc.ac.in)

and

[uvr123@gmail.com](mailto:uvr123@gmail.com)

Tel.: +918023600168

Fax: +918023602697

# **OsZIP47 an integrator for meristem regulators during rice plant growth and development**

Sandhan Prakash<sup>#</sup>, Rashmi Rai<sup>#</sup>, Raghavaram Peesapati and Usha Vijayraghavan<sup>\*</sup>

Department of Microbiology and Cell Biology, Indian Institute of Science, Bangalore, 560012, India

<sup>#</sup> Equal first authorship

<sup>\*</sup>**Correspondence:** Usha Vijayraghavan; Email: [uvr@iisc.ac.in](mailto:uvr@iisc.ac.in)

**One sentence summary:**

OsZIP47 regulates rice shoot meristem size, panicle and floret development in concert with other meristem regulators such as OsMADS1, RFL and OSH1.

**FOOTNOTES:**

This work was funded by the Department of Biotechnology, Ministry of Science and Technology, Government of India. DBT-IISc partnership programme to Biological Sciences, grants to UV from Department of Biotechnology for Rice Functional Genomics. University Grants Commission, Delhi is acknowledged for DS Kothari postdoctoral research fellowship to RR. Research fellowship to RP was from Indian Institute of Science. We acknowledge the DBT-IISc Divisional Bio-imaging and Greenhouse Facilities.

\* Address correspondence to [uvr@iisc.ac.in](mailto:uvr@iisc.ac.in)

The author responsible for distribution of materials integral to the findings presented in this article in accordance with the policy described in the Instructions for Authors ([www.plantphysiol.org](http://www.plantphysiol.org)) is: Usha Vijayraghavan ([uvr@iisc.ac.in](mailto:uvr@iisc.ac.in))

U.V., S.P., and R.R. designed the research. S.P. and R.R. performed research and experiments. R.P. performed bioinformatic analyses. Data analyses and manuscript preparation was done by S.P., R.R., and U.V. All authors read and approved the final manuscript.

## ABSTRACT

Stem cell homeostasis by the WUS-CLV negative feedback loop is generally conserved across species; however, its links with other meristem regulators may have species-specific distinctions, rice being an example. We characterize rice OsbZIP47 for vegetative and inflorescence phenotypes in knockdown (OsbZIP47KD) transgenics and uncover its role in meristem maintenance and developmental progression. The shoot apical meristem (SAM) size in five day old OsbZIP47KD seedlings, was reduced as compared to the wild-type (WT). Whereas SAM in older twenty-five-day OsbZIP47KD plants was larger with increased size for L1 and underlying cells. We tested protein interactions of OsbZIP47 with other transcription factors and found partnerships with OsMADS1, RFL, and OSH1. Results from meta-analysis of deregulated panicle transcriptome datasets, in OsbZIP47KD, OsMADS1KD and RFLKD knockdown transgenics, and OSH1 genome-wide binding sites divulge potential targets coregulated by OsbZIP47, OsMADS1, OSH1 and RFL. Transcript analysis in OsbZIP47KD SAM and panicles showed abnormal gene expression for CLAVATA peptide-like signaling FON2-LIKE CLE PROTEIN1 (FCP1), FLORAL ORGAN NUMBER 2 (FON2), and hormone pathway: cytokinin (CK) Isopentenyltransferase2 (OsIPT2), Isopentenyltransferase8 (OsIPT8); auxin biosynthesis OsYUCCA6, OsYUCCA7; gibberellic acid (GA) biosynthesis GA20Ox1, GA20Ox4 and brassinosteroid biosynthesis CYP734A4 genes. The effects on ABBERRANT PANICLE ORGANIZATION1 (APO1), OsMADS16, and DROOPING LEAF relate to second and third whorl organ phenotypes in OsbZIP47KD florets. Further, we demonstrate that OsbZIP47 redox status affects its DNA binding to cis elements in the FCP1 locus. Taken together, we provide insights on unique functional roles for OsbZIP47 in rice shoot meristem maintenance, its progression through inflorescence branching and floret development.

**Keywords:** Rice (*Oryza Sativa*), Shoot Apical Meristem (SAM), panicle, floret organs, bZIP protein, PERIANTHIA (PAN), FASCIATED EAR4 (FEA4), OsMADS1, signaling pathways

# INTRODUCTION

The post-embryonic development in flowering plants depends on the balance between stem cell renewal in the central zone of above ground meristems and the adoption of specific differentiation programs from the peripheral zone. The genetic framework of the basic WUS-CLV pathway for meristem maintenance is largely conserved in monocots and dicots yet some functional differences are reported among the cereal grass models maize and rice. The tissue-specific effects of a pair of paralogous rice *CLV3-like* genes, that encode the ligand in this signalling pathway (Suzaki et al., 2004; Suzaki et al., 2006), and the male vs. female inflorescence specific roles for maize *CLV1* and *CLV2* homologs, *THICK TASSEL DWARF1* (*TD1*) and *FASCIATED EAR2* (*FEA2*), exemplify species-specific innovations in components of this core meristem regulatory circuit (reviewed in Bommert et al., 2005b; Dodsworth 2009; Paulter et al., 2013; Chongloi et al., 2019). *FLORAL ORGAN NUMBER 1* (*FON1*) is the rice ortholog of *CLV1*, while *FON2/FON4*, *FON2 SPARE1* (*FOS1*) and *FCP1* (*FON2-LIKE CLE PROTEIN1*) are CLV3 peptide paralogs. Interestingly, FON2 signaling through FON1 majorly regulates homeostasis in the inflorescence meristems whereas FCP1 triggered signaling regulates the vegetative shoot apical meristem (SAM) through effects on *OsWOX4*; functionally related to *AtWUS* (Nagasawa et al., 1996, Suzaki et al., 2004, 2006; Ohmori et al., 2013). Integration of CLV-WUS pathway with the roles of class I *Knotted-1-like homeobox* (*KNOX*) genes, *Arabidopsis* *STM*, rice *OSHI* and maize *KNOTTED1* (*KN1*) in meristem maintenance is conserved across species (Long et al., 1996; Tsuda et al., 2011; Vollbrecht et al., 2000). Similarly, the interlinking of WUS-CLV pathway with phytohormone-based meristem control by cytokinin (CK), auxin (IAA/AUX), Gibberellin (GA), Brassinosteroid (BR) is also conserved (Lee et al., 2009; Gordon et al., 2009; Kurakawa et al., 2007; Yamaki et al., 2011; Zhao et al., 2010, Somssich et al., 2016). ). The feed-forward regulatory loop of *KNOXI* homeobox transcription factor genes, *AtSTM/ZmKN1/OSHI*, maintains the SAM by crosstalk with cytokinin (CK) pathway and *AtWUS* also regulates cytokinin signaling (Kerstetter et al., 1997; Brand et al., 2002; Leifried et al., 2005; Bolduc and Hake, 2009; Tsuda et al., 2011, 2014, Ohmori et al., 2013; Gordon et al., 2009; Kurakawa et al., 2007). Despite several conserved components for

meristem regulation among eudicot and monocot species, the interconnecting regulators are poorly understood in cereals.

In the floral meristem center the timing of the termination of stem cell activity is co-incident with carpel/ovule specification. This creates a determinate floral meristem for normal reproduction. Meristem termination is mediated by the concerted activity of floral organ identity genes (Class A, C and E) whose regulatory effects on *WUS-CLV* and/or *WUS-KNOX* pathway genes operates in both monocots and eudicots (reviewed in Tanaka et al., 2013; Callens et al., 2018; Chongloi et al., 2019). These homeotic genes are in turn spatially and temporally regulated. For example, *AtLEAFY* directly activates *API*, and *WUS* (Lenhard et al., 2001; Lohmann et al., 2001) and repress shoots meristem identity gene *TERMINAL FLOWER1 (TFL1)* (Moyroud et al., 2009, 2010). Furthermore, in young floral meristems *LEAFY (LFY)* together with *UNUSUAL FLORAL ORGAN (UFO)* and *WUS* activates *AP3* and *AG* gene expression in third and fourth whorls of the developing meristem (Parcy et al., 1998; Busch et al., 1999; Wagner et al., 1999; Lenhard et al., 2001; Lohmann et al., 2001). In later developmental stages the activation of *KNUCKLES (KNU)*, by *AG*, leads to repression of *WUS* by the recruitment of Polycomb group (PcG) chromatin modifiers (Ming and Ma, 2009; Sun et al., 2009, 2014; Liu et al., 2011; Zhang, 2014). Aside from *LFY*, other regulators of *AG* expression are known, one of which is *PERIANTHIA (PAN)* that encodes a bZIP class TF, whose orthologs are *OsZIP47* and *ZmFEA4* in rice and maize respectively. Floral meristem size and organ patterning defects in *Arabidopsis pan-3 lfy-31* double mutant, and in transgenics with modified *PAN* fusion proteins (repressive vs. activated forms) show its role in floral determinacy, meristem size and floral organ patterning (Chuang et al., 1999; Running and Meyerowitz, 1996; Das et al., 2009; Maier et al., 2009, 2011). Maize *ZmFEA4 (FASCIATED EAR4)* is a positive regulator of lateral organ differentiation in both vegetative and reproductive growth phases. Its effects on auxin pathway, balances *WUS* and *KNOTTED1 (KNI)* based meristem homeostasis and promotes the expression of lateral organ genes *YABBY3*, *KANADI*, *ASYMMETRIC LEAVES2*, *CUC* among several others (Pautler et al., 2015). Functions for its rice homolog, *OsZIP47 (LOC\_Os06g15480)* are not well studied, however extensive genetic and molecular studies have identified many other rice meristem homeostasis factors. For instance during rice inflorescence (panicle) development *ABERRANT PANICLE ORGANIZATION 1 (APO1)*, ortholog of *AtUFO* and *APO2/RFL*, ortholog of *LFY*, interact and promote panicle branch meristem (BM) indeterminacy thereby regulate spikelet

meristem (SM) to floral meristem (FM) transition (Ikeda et al., 2005, 2007; Rao et al., 2008, Ikeda-Kawakastu et al., 2009, 2012). Other rice inflorescence branch meristem identity and transition regulators are closely-related gene members of the AP2-ERF family: *OsIDS* (*INDETERMINATE SPIKELET*), *SNB* (*SUPERNUMERARY BRACT*), *FZP* (*FRIZZY PANICLE*), *MFS1* (*MULTIPLE FLORET SPIKELET1*). These genes control flowering time and progression through panicle branching by regulating other classes of genes like *RFL* and the MADS-box genes, *OsMADS1* and *OsMADS6*, among others (Lee and An, 2012; Komatsu et al., 2003, Ren et al., 2013). How these inflorescence BM identity and transition regulators intersect with the core canonical CLV-WUS and WUS-KNOXI meristem maintenance circuits is not much explored in rice or maize. Our studies on phenotypic and functional characterization of rice *OsbZIP47* by RNA interference (dsRNAi) based knockdown (KD) give clues on its role in meristem size and identity, and on downstream pathways that can be co-regulated by *OsbZIP47* and *OSH1*, *OsMADS1* and *RFL*.

## RESULTS

### *Os*bZIP47 knockdown plants have abnormal SAM Size

To investigate developmental roles of *Os*bZIP47 we generated *Os*bZIP47 knockdown transgenics (*Os*bZIP47KD) by RNA interference (dsRNAi). Phenotypic analysis in the T3 generation for one of the lines: *Os*bZIP47KD line #14 was done. In pooled panicle tissues (0.1-0.5cm) from this line qRT-PCR showed ~24-fold down regulation of the endogenous *Os*bZIP47 transcripts (Supplemental Fig. S1). The earliest phenotype noted was the seedling height at 8 days after germination (DAG), which was significantly reduced in *Os*bZIP47KD as compared to wild type (*WT*) (Fig. 1B and C, Supplemental Table S1). This observation lead us to investigate the size of shoot apical meristem (SAM) in histological sections of 5 DAG and 25 DAG seedlings from both wild type (*WT*) and *Os*bZIP47KD plants. Interestingly, the 5 day old *Os*bZIP47KD seedlings show reduced SAM (895.7  $\mu\text{m}^2$ ) area as compared to that in *WT* (1131  $\mu\text{m}^2$ ); whereas in 25-day *Os*bZIP47KD seedlings SAM area was contrastingly increased (Fig. 1E). To understand the cellular differences that underlie these meristem abnormalities, the number of cells in L1 layer, were counted to identify reduced number of L1 cells in 5 and 25 DAG *Os*bZIP47 KD seedlings (Supplemental Fig S2). Further, L1 layer cell size in apical and basal regions (the peripheral zone) of the meristem and for internal cells underlying the L1 layer (as marked in Fig.1D) was measured. In 5 DAG seedlings we observed reduced L1 cell size in the apical region whereas L1 cell size in the basal/ peripheral and cell size in internal regions of meristem were not altered (Fig. 1F). This suggests that the compromised overall SAM area in 5 DAG seedling is probably due to decrease in the number and size of apical L1 cells. Intriguingly, in 25 DAG *Os*bZIP47KD seedlings L1 cell size in apical and basal/peripheral regions was increased. Strikingly, cells underlying the L1 apical region were larger (Fig. 1D, F). This suggests the increased SAM area in 25 DAG seedlings is probably not due to increased cell number but rather due to enlarged cell size. The spatial distribution of dividing cells was assessed by RNA *in-situ* for the cell cycle S-phase maker HISTONE4 (H4) (Supplemental Fig. S3). Compared to the *WT*, the overall signal in *Os*bZIP47KD tissues (5 D and 25D) was higher. Also, we observed unexpected higher signals in the meristem central region, mainly in 25 DAG seedling which was reminiscent to the pattern in *sho* mutant in *OSH1* (Itoh et al., 2000). Together these data on likely altered cell division patterns in the SAM of *Os*bZIP47KD plants



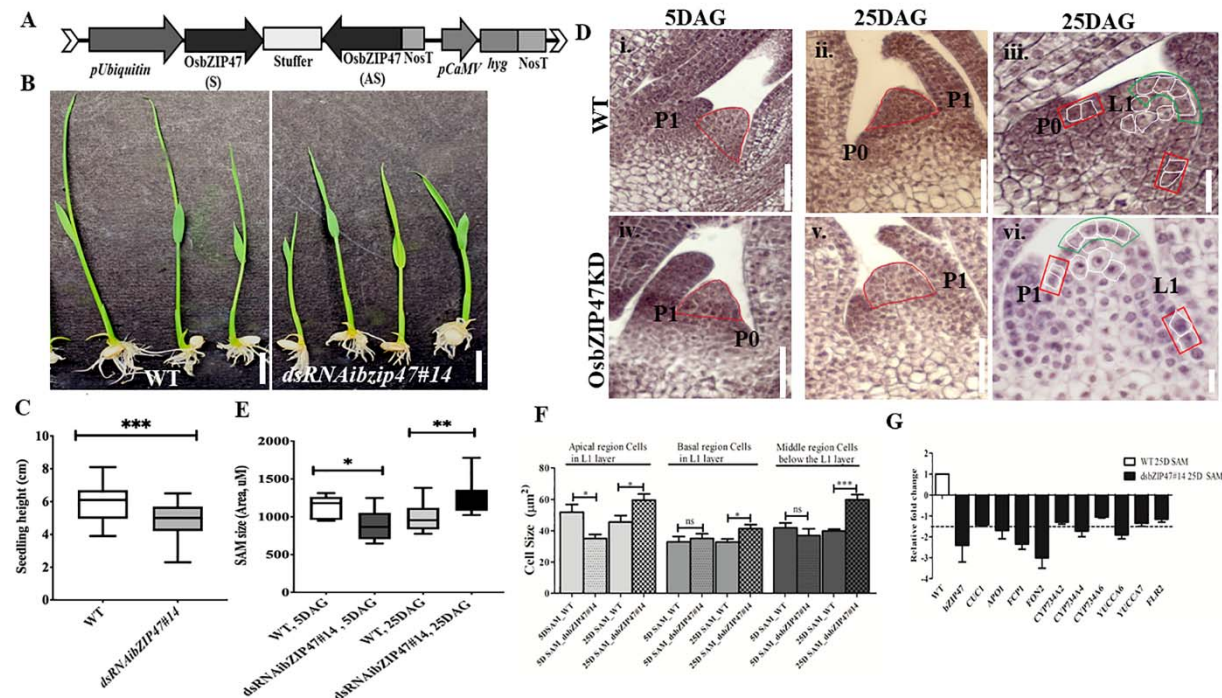

**Figure 1. *OsbZIP47* knockdown (KD) vegetative phenotypes.**

(A) Schematic representation of *dsRNAiOsbZIP47* transgene T-DNA segment. (B) Seedling height of 8 day *OsobZIP47KD* plants is shorter than that of wild type (*WT*) plants. Scale bar = 1 cm. (C) Seedling plant height data shown as mean ± s.d., Student's *t* tests, \*\*\*P < 0.0001, n=30. (D) and (E) Comparison of SAM area in *OsobZIP47KD* vs. *WT* in 5 DAG (days after germination) and 25 DAG seedlings. SAM area, marked by red outline in panels i, ii, iv, and v, is reduced in 5 DAG *OsobZIP47KD* seedlings but is increased in 25 DAG seedlings. Scale bar in i, ii, iv, and v are 50 μm, and iii and vi are 20 μm. Data is shown as mean ± s.d. Student's *t* tests, \*P < 0.01, \*\*P < 0.001, n=10. (F) Comparison of cell size in the apical region, the internal underlying apical L1 and in the peripheral zone of the meristem. The average of 5 cells was taken as a data point for a single section and 10-12 different sections were taken for statistical analysis. Asterisks indicate significant differences from wild type at \*P < 0.01, in 5 DAG SAM, \*\*\*P < 0.0003 in 25 DAG SAM tissues respectively. NS denotes non-significant difference. (G) RT-qPCR analyses of *CUC1*, *APO1*, *FCP1*, *FON2*, *CYP734A2*, *CYP734A4*, *CYP734A6*, *YUCCA6*, *FLR2* and *FON2* transcripts from candidate targets in SAM from 25 DAG seedlings. Fold change values were determined by comparing the normalized expression levels in *OsobZIP47KD* plants to *WT* plants.

235 (Supplemental Fig. S3) indicate a regulatory role for *OsbZIP47* in meristem (SAM) maintenance.  
 236 To understand the molecular signatures relating to these meristem defects we tested transcript  
 237 levels for few known SAM regulators (Fig. 1G) in 25 DAG seedlings. The down-regulation of

*FCP1* and *FON2* (rice homologs of *CLV3*), *APO1* (*UFO1* homolog), *CYP734A4* and *YUCCA6* was observed. *CUC1*, lateral meristem boundary marker, showed a marginal reduction in expression. These gene expression effects of *OsbZIP47* can be related to abnormal SAM maintenance on its knockdown with novel effects on components in the CLV-WUS pathway, on other meristem regulators, auxin and brassinosteroid phytohormone pathways.

### **Late heading date and altered panicle architecture on *OsbZIP47* knockdown**

*OsbZIP47KD* plants are delayed by 20 days for flowering i.e., SAM to inflorescence meristem (IM) transition. At this stage *OsbZIP47KD* plant height was reduced as compared to *WT* (Fig. 2A to D) and suggests that *OsbZIP47* promotes the transition from vegetative to the reproductive phase. The shorter plant height was due to poor stem internode elongation in the KD transgenics without change in internode number (Fig. 2F). The panicle of knockdown plants showed developmental abnormalities: reduced inflorescence axis (panicle rachis) length, lowered primary branch (Fig. 2E, and spikelet number (Fig. 3 A, L and M; Supplemental Table 1). These events together indicate an early progression of primary branch meristems to spikelets in these *OsbZIP47KD* plants and point to a possible role of *OsbZIP47* in the temporal control of branch meristem indeterminacy. Moreover, *OsbZIP47KD* plants had greater flag leaf lamina joint angle as compared to the *WT* (Fig. 3B, C, K). Mutants in *cyp734a4* (Tsuda et al., 2014), a downstream gene target of *OsbZIP47* (see Fig. 1G) also share this phenotype and have abnormal meristems. Plant architecture, flowering time, leaf angle and inflorescence architectures all impact yield, grain shape and size (Harder and Prusinkiewicz, 2013; Sakuma and Schnurbusch., 2019). Interestingly the seeds from *OsbZIP47KD* plants were altered for the length/width (L/W) ratio as compared to *WT* seeds (Fig. 3I and J).

### ***OsbZIP47* contributes to second and third whorl, lodicule and stamen, organ development**

*OsbZIP47KD* floret phenotype were largely restricted to lodicules, and stamens (Fig. 3D to 3H). The organ defects were grouped into four classes. In class I, 40% florets had mild deformed lodicule (distal elongation) with normal stamen number (Supplemental Fig. S4), class II ~28% florets showed mild lodicule elongation with abnormal short stamens and indehiscent anthers (Fig. 3H). In florets of class III (~20%) had partially deformed lodicules with an increase in stamen number to 7 (Fig. 3E and G). In the ~12% class IV knockdown florets, mildly elongated

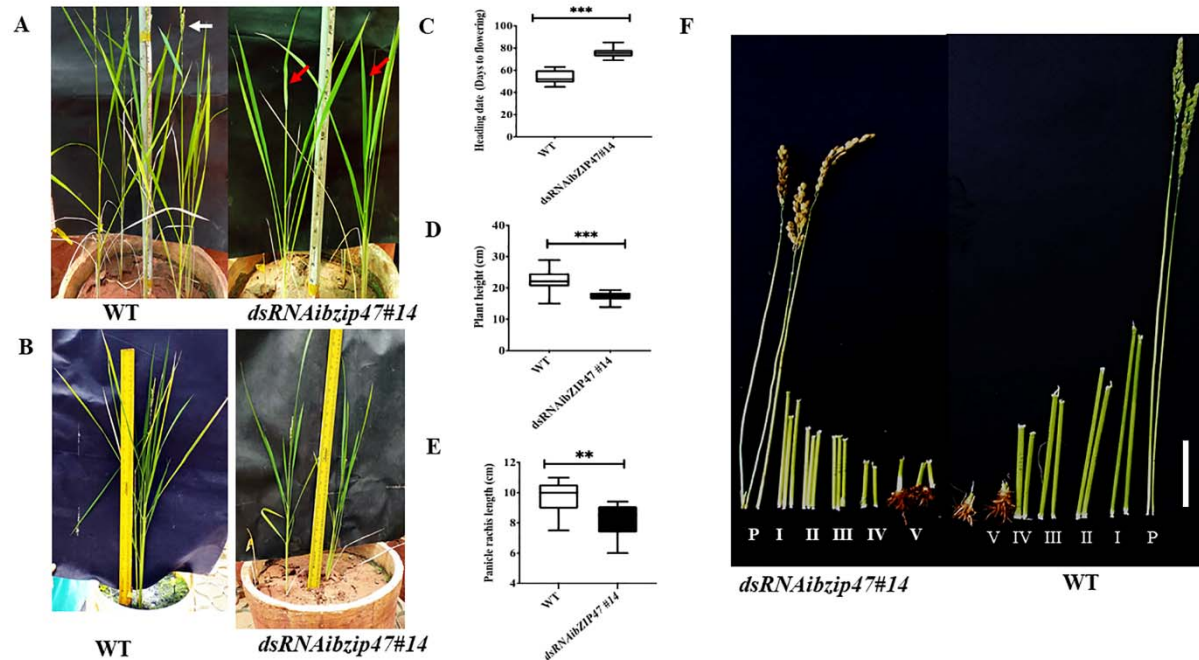

**Figure 2. Phenotypic effects of *OsbZIP47KD* on plant growth and floral transition.**

(A) Flowering timing (SAM to Inflorescence Meristem/ panicle meristem transition) in *OsbZIP47KD* plants is delayed by ~22days as compared to the *WT*. White arrow indicates the booting panicle in *WT* and red arrow points the absence of the booting panicle in a *OsbZIP47KD* plant of the same age. (B) Plant height in mature flowering plants shows as compared to the *WT*, *OsbZIP47KD* plants are shorter. Quantitation of heading dates (C) plant height (D) and panicle rachis length (E) in *WT* and *OsbZIP47KD* plants. Data are shown as the mean  $\pm$  s.d. (Student's t tests, \*\* $P < 0.01$ ,  $n = 10$ ). (F) Internodes in mature flowering *WT* and *OsbZIP47KD* plants are displayed and are numbered I to V from the apical end. P is the panicle bearing node and internode. Bar, 2.5 cm. Shorter internodes I to V in *OsbZIP47KD* contributes to the reduced height.

270 lodicules co-occurred with chimeric organs usually with lodicule and stamen characteristics (Fig.  
 271 3F, G and H). Also, in most florets the lemma, was abnormally fused with lodicule making  
 272 dissection of the lemma away from lodicule difficult. All together these data suggest *OsbZIP47*



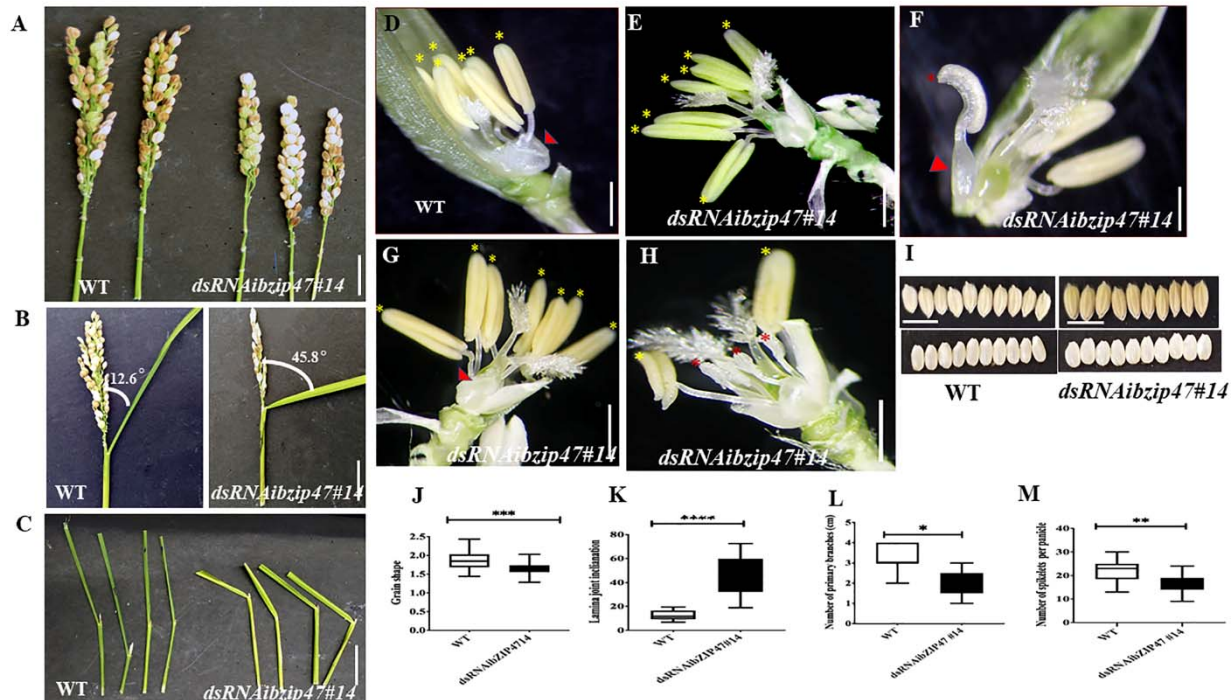

**Figure 3. Floret organ numbers and organ development in *OsbZIP47KD* plants.**

(A) Shorter panicle *OsbZIP47KD* with reduced number of primary branches and spikelet number per panicle as compared to wild type plant. (B) and (C), Flag leaf angle in fully headed panicles of mature plants show increased lamina joint angle in *OsbZIP47KD* plant as compared to the WT. (D) WT floret organs shown after removal of lemma and the spikelet sterile lemmas. Red arrow points to the pair of lodicules and yellow asterisks to the six normal stamens. (E-H), Organ phenotypes in *OsbZIP47KD* florets. (E) Floret with 7 stamens (yellow asterisks) with normal filaments and anthers. (F) Floret with mildly deformed lodicule (red arrowhead), two of the six normal stamens (others were dissected out) and a chimeric second whorl organ with lodicule and stamenoid tissues (red asterisk). (G) Floret with deformed lodicule and 7 normal stamens (yellow asterisk). (H) Floret with slightly deformed lodicule, short stamens and shrunken anthers (red asterisk), two near normal stamens (yellow asterisk). (I) and (J), Grain morphology in *OsbZIP47KD* and WT plants. The length/width (L/W) ratio of *OsbZIP47KD* seeds was lower than WT seeds, suggesting increased grain width. Scale bar = 1 cm in panels in A to I. (J-M), Statistical analysis (mean ± s. d.) of grain shape, lamina joint angle, primary branch number, number of spikelets per panicles. Data in J (n=40 in J), K (n=10), L (n=11), M (n=9), Student's t tests, \*\*P < 0.01, \*\*\*P < 0.001.

contributes to floral organ development in the second and third whorls. As a complementary analysis we examined consequences of ubiquitous overexpression of full-length cDNA of *OsbZIP47* in transgenic rice (Supplemental Fig. S5). None of the *OsbZIP47Ox* lines showed

changes from the *WT* (data not shown). A speculation is that *OsbZIP47* functions may depend on partners or that some post-translational modifications (PTMs) may modulate its functions, as also concluded from overexpression studies of Arabidopsis *AtPAN* (Chuang et al., 1999).

# **Tissue expression profile of OsbZIP47 through development**

RNA *in situ* hybridization was performed to examine the spatial distribution of *OsbZIP47* mRNA. These experiments confirmed transcripts in various meristems, consistent with the phenotypes seen on *OsbZIP47KD*. Transcripts are evenly distributed in SAM of young seedlings (5 DAG) with slightly higher levels in the emerging leaf primordia (Fig. 4A). This pattern is somewhat different from maize *FEA4* where the signals are excluded from SAM stem cell niche and from incipient P0 leaf primordium (Paulter et al., 2015). The spatial pattern of *OsbZIP47* transcripts in SAM of 25 day plants is similar to that in 5 DAG plants (Fig. 4B). During reproductive development, high levels of *OsbZIP47* transcripts are at apical end of growing inflorescence meristem (IM/ rachis) and the ends of branch meristem (PBM and SBM) which relates to the poorly branched inflorescence of knockdown plants. In elongating primary and secondary branches (Fig. 4C and D), in spikelet meristem (SM, Sp2, Fig. 4E), and in floral meristems (Sp4-Sp6, Fig. 4F) the signal is spatially uniform. However, in mature florets *OsbZIP47* RNA was confined to the lodicule, stamen and carpel organ primordia and differentiating organs (Fig. 4G). Additionally, hybridization signal in carpel wall (c) and ovule (o) (Fig. 4H) was observed. Arabidopsis *pan* mutant flowers occasionally have multiple carpel up to three with deviated gynoecium (Running and Meyerowitz, 1996; Running et al., 1998). We speculate *OsbZIP47* may have a minor role in carpel development or is functionally redundant fashion with floral C-class function genes. Thus, *OsbZIP47* is expressed in various above-ground meristems reflecting its diverse roles in different meristems.

# **Heterodimerization of OsbZIP47 with other floral meristem regulators**

Among the co-occurring motifs in genome-wide loci bound by OsMADS1, motif for bZIP factor binding is enriched (Khanday et al., 2016). This was the basis for our hypothesis that OsMADS1 and members of OsbZIP family could function in complexes in early floral meristems. Based on temporal co-expression profiles of *OsMADS1* and *OsbZIP47* (Arora et al., 2007; Nijhawan et al., 2008) we tested interaction among these proteins using the heterologous yeast two hybrid assay

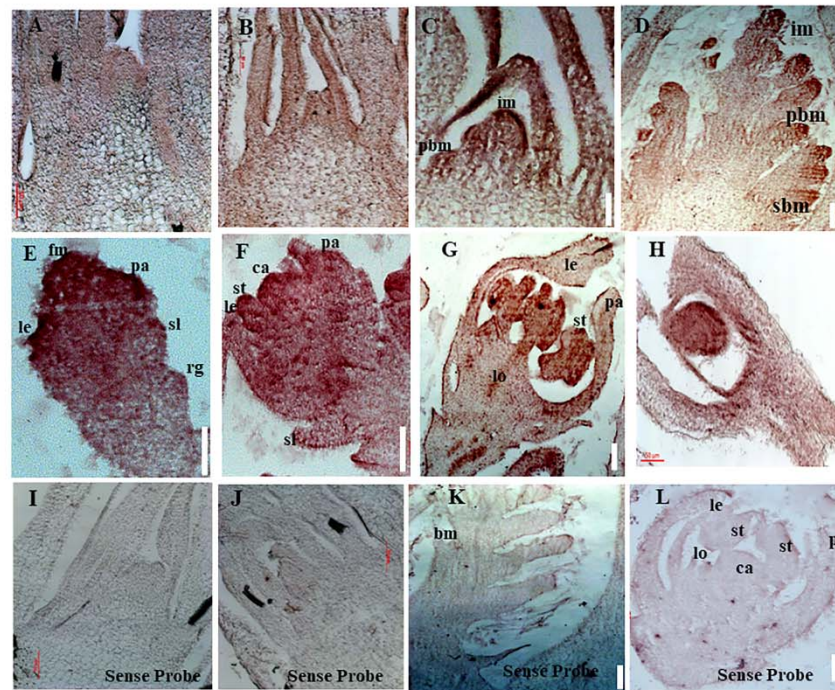

**Figure 4. Spatial distribution of *OsbZIP47* transcripts in meristems and florets.**

(A and B) *OsbZIP47* *in situ* RNA hybridization signal in SAM tissues from 5 DAG and 25 seedlings. Expression in SAM with slightly higher signal in emerging leaf primordia. (C and D) Inflorescence meristem (IM) with emerging primary branch meristems show expression of *OsbZIP47* in the elongation meristem and primary branch meristems (prb) and secondary branch meristems (srb) and in young leaves. (E) *OsbZIP47* transcripts in very early floret meristem (FM) with uniform spatial distribution of signal. (F) Floret uniform signal in the well-formed stamens (st), lemma/ palea (le and pa) organ primordia and in the central early carpel primordia. (G) High level *OsbZIP47* expression in the lodicule and in stamens, lower signal in the near mature lemma and palea. (H) *OsbZIP47* transcripts in the ovary wall and ovule. (I and J) SAM in 5 DAG and 25 DAG plants probe with sense probe as a negative control. (K and L) IM and near mature floret respectively probed with sense RNA.

(Fig. 5). Additionally, to investigate possibility of *OsbZIP47* heterodimerization with other meristem regulators, we relied on reports from genetic studies in Arabidopsis, or maize, or rice to curate and choose candidates (Das et al., 2009; Paulter et al., 2015; Khanday et al., 2013;



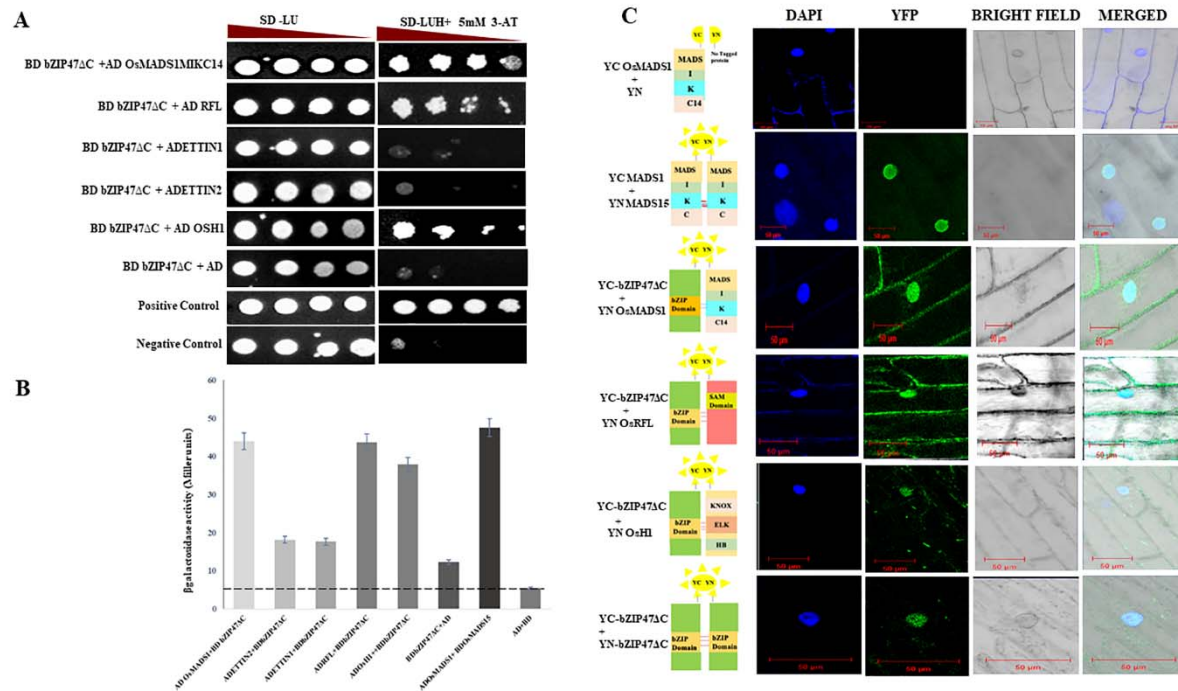

## 5. Interaction of OsbZIP47 with other meristem factors.

(A) Yeast two hybrid (Y2H) assays with OsbZIP47ΔC protein (lacking 186-380 amino acids in C terminal) and predicted protein partners such as OsMADS1 (MIKC14 domain), RFL, OsETTIN1, OsETTIN2 and OSH1. Serial dilutions of yeast cells (PJ694A) spotted on media lacking histidine and supplemented with 5mM 3-AT. Growth after five days at 30 °C is shown. (B) Quantitative β-galactosidase activity assay of the indicated interaction pairs. ONPG was used as a substrate for detection of *lacZ* reporter gene expression levels and absorbance was determined at 420 nm. Yeast transformants with OsMADS15 in pGBDUC1 vector and OsMADS1 MIKC14 in pGADC1vector served as positive control for protein interaction. A combination of pGADC1 and pGBDUC1 empty vectors (without protein fusion) was the negative control. (C) Validation of yeast two hybrid protein interactions by Bimolecular fluorescence complementation (BiFC) assays in onion epidermal cells. YFP fluorescence was detected when OsbZIP47ΔC-cYFP fusion protein was co-expressed with OsMADS1-nYFP, RFL-nYFP, and OSH1 nYFP. Absence of YFP fluorescence in the negative control i.e., OsbZIP47ΔCYC and YN domain alone was the negative control. Bars=50 μm.

310 Deshpande et al., 2015). OSH1, RFL, ETTIN1 and ETTIN2 emerged as candidates. We re-  
 311 visited reports on the panicle and floret expression patterns of these meristem regulators to  
 312 deduce if spatial co-expression of *OsbZIP47*, *OSH1* and *OSH15* could occur. RNA *in situ*

patterns of *OSH1* in rice panicles and florets (Komatsu et al., 2001; Chu et al., 2006; Yoon et al., 2017) and *OsbZIP47* transcript spatial profile (Fig. 4) point to an overlap of *OsbZIP47* and *OSH1* transcripts in primary and secondary branch primordia and in a broad range of developing spikelet/ floret meristems (Sp2 to Sp8) (Supplemental Fig. S6). Moreover, Paulter et al., (2015) reported the several gene loci are bound by ZmKN1 (the ortholog of rice OSH1) and ZmFEA4 (ortholog of OsbZIP47). These together indicate likelihood of OsbZIP47 and OSH1 interactions for co-regulation of targets. In Arabidopsis, *pan ettin* phenotypes suggest *AtPAN* and *AtETTIN1/Auxin-Responsive Factor3 (ARF3)* redundantly regulate floral organ numbers and patterns (Sessions et al., 1997). Additionally, rice *ETTIN1* and *ETTIN2* RNAi lines have aberrant plant height, compromised panicle branching and defects in stamen and carpel development (Khanday et al., 2013). Some of phenotypes resembled those observed in *OsbZIP47KD* plants. Thus, we hypothesized OsETTIN1 and OsETTIN2 may interact with OsbZIP47 to modulate aspects of organ development. Similarly, mutant alleles in *RFL*, the rice *AtLEAFY* ortholog, (*apo2* and *scc* allele) or *RNAi RFL* knockdown (Kyoizuka et al., 1998; Rao et al., 2008; Wang et al., 2017) and mutants in *OSH1* (*osh1*) (Tsuda et al., 2009, 2011, 2014), the rice ortholog of *ZmKN1*, share some phenotypes of *OsbZIP47KD* plants. Common phenotypes are shorter plant height, delayed flowering, reduced panicle rachis length and branch complexity. Based on these meta-analyses, protein partnership between OsbZIP47 and ETTIN1, ETTIN2, RFL, and OSH1 was tested by the yeast two-hybrid (Y2H) assay. OsZIP47ΔC (lacking 186-385 amino acids from the C-ter was taken at bait protein in fusion with Gal4 BD and prey proteins (OsMADS1, or OSH1, or RFL, or ETTIN1, or ETTIN2) were fused to GAL4 AD. The GAL4AD-OsMADS15 interaction with GAL4DB-OsMADS1 was taken as the positive control (Moon et al., 1999; Lim et al., 2000). Also, homodimerization capability of OsbZIP47ΔC was tested. Based on growth pattern of transformed yeast cells on reporter media SD/-Leu-Ura-His + 5mM3AT and the X-gal quantitative assays we infer a strong interaction between OsbZIP47 and OsMADS1 and RFL whereas OSH1 and OsbZIP47 have moderate interaction (Fig. 5A and B). We also performed *in-planta* Bimolecular fluorescence complementation (BiFC) assays. *OsbZIP47ΔC* was cloned upstream to the coding sequence of C-terminal region of split YFP to express *OsbZIP47ΔC*-cYFP fusion protein. The CDS of *OsMADS1*, *OsbZIP47ΔC*, *RFL*, *OsETTIN1*, *OsETTIN2* and *OSH1* were cloned in frame downstream to coding sequence of the N-terminal split YFP (nYFP) to express nYFP fusion proteins. These six different combinations of nYFP and cYFP fusions



were transiently co-expressed in onion epidermal cells. Nuclear YFP fluorescence signals confirmed protein interaction of OsbZIP47 with OsMADS1, OSH1 and RFL (Fig. 5C). Thus, we suggest that OsbZIP47 partnership with OsMADS1, OSH1, and RFL could contribute to meristem functions.

# **Transcriptome of developing inflorescences of bZIP47 knockdown lines**

To capture the gene expression landscape in the *OsbZIP47KD* panicles we carried out high throughput RNA-sequencing in two biological replicates of *OsbZIP47KD* and *WT* panicles (ln2-ln4, 1mm to 5mm panicles), and the differentially expressed genes (> two-fold change, p value <0.05) were extracted (Supplemental dataset S1; Supplemental Material and Methods). Among them, 1944 genes had lowered transcript levels in *OsbZIP47KD* hence during normal development their expression is likely upregulated by OsbZIP47. On the other hand, 856 genes had elevated transcript levels in knockdown tissues and thus these are the genes directly or indirectly downregulated by OsbZIP47 (Supplemental dataset S1). Gene Ontology (GO) analysis of these positively regulated gene sets (Fig. 6A and B; Supplemental Materials and Methods; Supplemental dataset S2) revealed that RNA (regulation of transcription), lipid and CHO metabolism, signalling, development and hormone metabolism were enriched in the positively regulated gene set (Fig. 6A). Whereas genes related to secondary metabolism, transport, cell wall, signalling, stress, hormone metabolism and miscellaneous were overrepresented in the negatively regulated set (Fig. 6B). Not surprisingly, genes involved in hormone metabolism are controlled by OsbZIP47 either positively and negatively (Fig. 6C and 6D). Specifically, Jasmonate (JA) and Absciscic acid (ABA) pathway genes are overrepresented in the positively regulated gene set. While Auxin, cytokinin (CK) and ethylene pathway genes are notable in the negatively regulated gene set, members of gibberellic acid (GA) pathway occur in both positively and negatively regulated gene sets (Fig. 6B). Here we give examples of *OsbZIP47* downstream genes that could interlink hormone pathways for panicle and floret development. OsAP2-39 balances the antagonistic relation between ABA and GA by modulating expression levels of *OsNCED1* (9- cis-epoxycarotenoid dioxygenase1) and *OsEUII* (Elongated Upper most Internode1) for seed germination and plant development (Yaish et al., 2010; Shu et

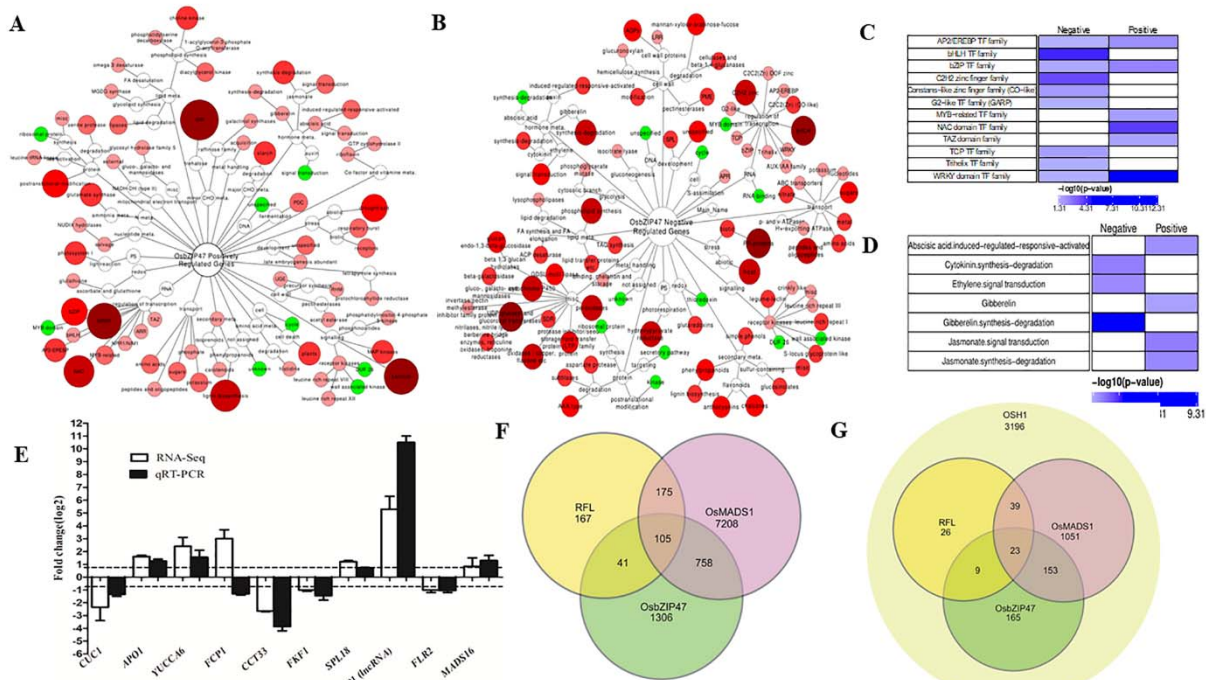

**Figure 6. Differentially expressed genes (DEGs) and a GO enrichment analysis of pathways downstream to OsbZIP47.**

Enrichment networks depicting pathways regulated by OsbZIP47. (A) positively regulated, and (B) Negatively regulated pathways. The green and red color nodes represent enriched and depleted functional categories respectively ( $P < 0.05$ ). The size and color intensity of the node correlates with the over-representation of genes within the given class. (C) Enrichment map of transcription factor (TF) genes shows those encoding members from bHLH, G2-like, C2H2 zinc finger, TCP, Trihelix are underrepresented, whereas TFs such as AP2/EREBP, MYB-related, NAC domain, TAZ, WRKY, bZIP were overrepresented. (D) Enrichment analysis of genes for phytohormone metabolism and signaling. Cytokinin, Ethylene, Gibberellin pathways were enriched in negatively regulated dataset, whereas, Absciscic acid, Gibberellin, and Jasmonate pathways predominate in the positively regulated set. (E) RT-qPCR analysis of the relative fold change for transcripts from several candidate target genes of OsbZIP47 in 0.1 to 0.5 cm panicles from *OsbZIP47KD* as compared to *WT* tissues. The normalization of transcript level of each gene was done using *UBQ5* transcript levels. Error bars represent the standard deviation. (F) Venn diagram showing unique and overlapping sets of differentially expressed genes derived from *OsMADS1*, *OsbZIP47* and *RFL* transcriptome datasets (Rao et al. 2008; Khanday et al., 2013 and this study). (G) Genes implicated to be coregulated by *OsMADS1*, *OsbZIP47*, and *RFL* and bound by *OSH1* (Rao et al. 2008; Khanday et al., 2013; Tsuda et al., 2014 and this study).

al., 2013, 2016). Interestingly, we observe positive regulation of *OsAP2-39* and negative regulation of *EU11* by OsbZIP47. Thus, we suggest that OsbZIP47 enhances ABA biosynthesis and suppresses GA biosynthesis possibly to regulate plant height and rachis elongation (Fig. 2B

and F). Also observed is reduced *SPL7* expression that regulates inflorescence meristem and spikelet transition (Dai et al., 2018) and reduced *OsMADS16* transcripts, a Class B stamen and lodicule organ identity gene (Nagasawa et al., 2003). These findings correlate well with the *OsZIP47KD* inflorescence branching and floret organ defects (Fig. 2 and 3). Transcription factors control the dynamics of hormone signalling pathways by modulating gene expression levels. Among transcription factors genes that are deregulated in *OsZIP47KD* panicles are – bHLH gene members (22), Co-like Zn finger (5 genes), TCP class 1 (2 genes) and TCP class 2 (1 gene), trihelix (4 genes), C2H2 zinc (13 genes), in the negatively regulated set (Fig. 6C, Supplemental dataset S2). The genes for transcription factors that are positively regulated by *OsZIP47* are from NAC class, WRKY class, and MYB-related class genes. Among the latter class are: *OsLHY* (*LATE ELONGATED HYPOCOTYL*) and *CCA1* (*CIRCADIAN CLOCK ASSOCIATED1*) which work in a regulatory loop to control photoperiodic flowering (Lu et al., 2009) plant tillering and grain yield (Wang et al., 2020). We speculate that the delayed flowering phenotypes and reduced plant height of *OsZIP47KD* plants can be associated with their positive regulation by *OsZIP47*. The organogenesis regulator *YABBY* domain factor- *DROOPING LEAF* (*DL*) functions in both carpel specification and in leaf development (Yamaguchi et al., 2004) and the F-box gene, *APO1* with roles in spikelet and floret development are affected in *OsZIP47KD* panicles (Supplemental dataset S1; Fig. 6E; Ikeda et al., 2005, 2007). The positive regulation of *CUC1* (*CUP-SHAPED COTYLEDON1*) by *OsZIP47* supports plausible mechanism for its influence on organ whorl boundaries (Takeda et al., 2011; Fig. 6E). We speculate that positive regulation of *DWARF AND RUNTISH SPIKELET2/FERONIA like Receptor 2* (*FLR2*) may contribute to architecture, fertility, and seed yield (Li et al., 2016; Fig. 6E). Overall, these results give a snapshot of *OsZIP47* molecular functions in inflorescence tissues and give leads to its unique vs. evolutionarily conserved roles for panicle meristem transitions, floral organ development.

### **Comprehensive datamining of transcriptome datasets of OsMADS1, OsZIP47, RFL and OSH1**

Extending the findings of *OsZIP47* interaction with *OsMADS1*, *OsZIP47*, *RFL* and *OSH1*, we carried out meta-analyses of published transcriptome datasets affected in mutants of these partner proteins. To identify candidate genes for co-regulation by these factors we examined the

408 differential transcriptome in *dsRNAiOsZIP47KD*, *dsRNAiOsMADS1* and *dsRNAiRFL* panicles  
 409 (Khanday et al., 2013; Rao et al., 2008). First we aligned genes from three different  
 410 transcriptomic datasets for this meta-study (Supplemental Materials and Method). 2210  
 411 deregulated genes in *dsRNAiOsZIP47KD* panicles were examined for overlap with 8246  
 412 affected genes in *dsRNAiOsMADSIKD* transcriptome (Fig. 6F; Supplemental dataset S3;  
 413 Khanday et al., 2013). 863 candidates for co-regulation by *OsZIP47* and *OsMADS1* were  
 414 deciphered (Fig. 6F Supplemental dataset S3); 204 of them were down-regulated in both  
 415 *OsZIP47KD* and *OsMADSIKD* lines. These include genes encoding *GASR3* (Gibberellin-  
 416 regulated protein precursor expressed), *OsSAUR11*, *DWARF AND RUNTISH SPIKELET2*  
 417 (*FLR2*), and *TIFY* (ZIM domain transcription factor). Another group of genes (386 out of 863  
 418 genes) were up-regulated in both *OsZIP47KD* and *OsMADSIKD* panicle datasets. This sub-set  
 419 consist of genes encoding for transcription factors that regulate hormone signalling such as,  
 420 *OsIAA20*, *YUCCA7*, *PIN5B* (*PROBABLE AUXIN EFFLUX CARRIER COMPONENT 5B*),  
 421 *EIL4*, (*ETHYLENE INSENSITIVE 3 LIKE 4*) gene, *GNP1* (*GRAIN NUMBER PER PANICLE1*)  
 422 and *OsMADS16*. Among the 863 candidate genes co-regulated by *OsZIP47* and *OsMADS1*, is  
 423 a subgroup of 153 genes (Fig. 6G) that are also bound by OSH1(Tsuda et al., 2014). Striking  
 424 among this sub-set are: *IAA20*, *YUCCA7*, *OsMADS27*, *SPLIT-HULL (SPH)* and *DWARF AND*  
 425 *RUNTISH SPIKELET2/FERONIA like Receptor 2 (FLR2)*. Similarly, 146 genes (Fig. 6F) are  
 426 common to the differentially expressed genes in *OsZIP47KD* panicles (RNA-Seq) and a low  
 427 density microarray study of panicles from *dsRNAiRFL* knockdown plants (Rao et al., 2008).  
 428 Interestingly, 33 out of 146 genes were down-regulated in both these datasets including ethylene  
 429 signalling gene *ACO1* which regulates internode elongation (Iwamoto et al, 2010), and  
 430 jasmonate signalling gene *TIFY11D* (Kim et al., 2009), and the *EMBRYOSAC1 (OsEMSA1)*,  
 431 involved in embryo sac development (Zhu et al., 2017). Lastly we identify 105 differentially  
 432 expressed genes common to the differential transcriptome in knockdown of *RFL*, *OsMADS1*, and  
 433 *OsZIP47* panicles (Fig. 6F) The notable genes include ethylene insensitive-like gene 2 (*EIL2*),  
 434 allene oxide synthase (*AOS1*), and gibberellin 2-oxidase 9 (*GA2OX9*). A sub-set of 23 genes are  
 435 potentially regulated by OSH1 (Fig. 6G, Tsuda et al., 2014). We infer that these transcription  
 436 regulators possibly multimerise in one or more forms of complexes to regulate the meristem  
 437 development in rice. Overall, these findings hint that protein complexes, plausibly  
 438 heterogeneous, with combinations of *OsZIP47* and its varied partner factors may spatially and



temporally co-ordinate downstream gene expression during panicle development, spikelet, and floret development.

# **Redox dependent DNA binding of OsbZIP47**

DNA binding by *Arabidopsis* AtPAN is redox-sensitive due to the five Cysteine residues in the extended N-terminal domain (Gutsche and Zachgo, 2016; Supplemental Fig. S8). Unlike PAN homologs from diverse species rice *OsbZIP47* lacks this domain. All proteins share a conserved Cys in the C terminal transcription transactivation domain (AtPAN Cys340/ *OsbZIP47*Cys269). Cys17 in *OsbZIP47* is conserved in monocot species, while Cys196 is unique to *OsbZIP47*. Thus, though the rice and *Arabidopsis* proteins are close homologs they differ in size and in the overall number of cysteine residues. To examine *OsbZIP47* oligomerisation and the effects of its redox status on binding to target gene *cis* DNA elements, the full length *OsbZIP47* protein was expressed in bacteria. The DNA binding activity of AtPAN is regulated by S-glutathionylation of the conserved Cys340 by AtROXY1, a glutaredoxin redox enzyme (Li et al., 2009; Gutsche and Zachgo, 2016). The corresponding conserved Cys 269 in *OsbZIP47* may also render the rice protein to be redox sensitive for biochemical activity. To determine if the protein forms higher order self-oligomers, size exclusion chromatography with the purified TrxHis *OsbZIP47* (62Kda) protein was done and the elution of the protein in the column void volume (Fig. 7A) suggested either aggregation or the formation of high order oligomers. To examine the latter possibility the purified *OsbZIP47*-Trx protein was treated with 2mM diamide, an oxidizing agent. Another aliquot of the protein was in parallel treated with 20mM DTT, a reducing agent, and both treated protein fractions were analysed on a non-reducing SDS-PAGE gel. The oxidized *OsbZIP47*-His-Trx sample had slower mobility whereas the reduced *bZIP47*-His-Trx sample migrated with the expected mobility for a ~68Kda protein. Importantly, we found that the effects of the oxidizing agent (diamide) can be reversed by DTT treatment. These data show *OsbZIP47* oligomerisation is affected by its redox-status (Fig. 7B). The DNA binding of *OsbZIP47* was tested at the TGACGT *cis* motif (predicted for bZIP DNA binding) at -371bp in the *OsFCPI*

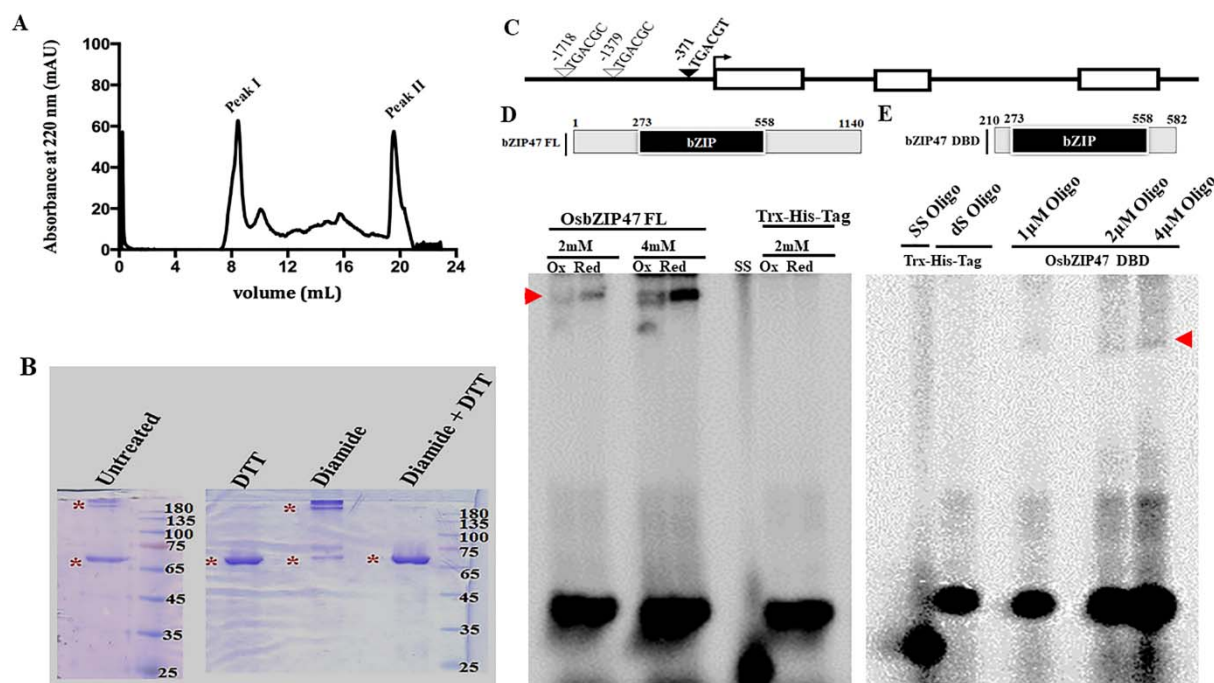

**Figure 7. OsbZIP47 oligomerisation and the effects of its redox status on DNA binding.**

(A) Size-exclusion chromatography (SEC) profile for OsbZIP47 protein/oligomer on a Superdex 200 increase column. (B) Mobility of purified OsbZIP47-Trx protein on non-reducing 10% SDS-PAGE after treatment with 2mM diamide (an oxidizing agent), or with 20mM DTT (a reducing agent), or with 2mM diamide followed by 20mM DTT. (C) Schematic representation of the *FCPI* gene locus. Exons are open white boxes, introns are shown as black lines, and the predicted *cis* motifs for bZIP DNA binding domain (DBD) are represented as inverted triangles. The DNA binding properties of OsbZIP47FL and partial OsbZIP47DBD proteins were tested for the TGACGT *cis* motif located at -371bp of *FCPI* (marked with a filled inverted triangle). (D and E) EMSA assays with full-length OsbZIP47 (62Kda protein) as compared to the partial protein of 34.3Kda containing OsbZIP47 DBD. Retarded mobility of DNA-protein complexes (red arrow) for the *FCPI* target site is indicated. Unbound dsDNA oligonucleotide are at the bottom.

468 locus; a downstream gene target whose expression levels are affected in the SAM and in  
 469 panicles of *OsbZIP47KD* plants (Fig. 7C; Fig. 1G). EMSA assays with full-length  
 470 OsbZIP4762Kda protein (Fig. 7D) were compared with the partial 34.3Kda OsbZIP47-DNA-

471 Binding Domain (DBD) alone (Fig. 7E). OsbZIP47 binding to DNA was redox dependent  
472 despite the absence of the extended Cys rich N-ter domain commonly found in homologs from  
473 other species.

474

475

# DISCUSSION

The DNA binding domain in Arabidopsis PAN, maize FEA4 and rice OsbZIP47 proteins is conserved (Chuang et al., 1999; Nijhawan et al., 2008). Hence any species-specific developmental roles for these factors may arise from interacting co-regulators, from protein modification and through variations in downstream pathways that they regulate. Arabidopsis *AtPAN* has pleiotropic vegetative and reproductive growth effects. Flowers in the *pan* mutant are characterized by an increase in floral organ number, without a corresponding increase in FM size (Running and Meyerowitz, 1996; Chuang et al., 1999). Another study reported early flowering in long days for the *pan* mutant, while plants grown short-days had enlarged SAM and inflorescence meristems (Maier et al., 2011). Maize mutant *zmfea4* have enlarged vegetative SAMs, severely fasciated inflorescences and florets with reduced stamen numbers (Pautler et al., 2015). We show *OsbZIP47KD* plants have abnormalities in shoot meristem size homeostasis that are similar to maize *fea4* mutant. Yet other phenotypes are unique to rice *OsbZIP47KD* lines for instance: delayed flowering, increased stamen numbers, chimeric floral organs and subtle changes to grain size and shape. The partnership of OsbZIP47, with meristem regulators- OsMADS1, RFL and OSH1 (KNOX1/ STM), its oligomeric and redox status could relate to its functions in different meristems. These partnerships and the findings that emerge from the differential transcriptome in *OsbZIP47KD* panicles allowed us to map downstream genes regulated by OsbZIP47, and those potentially dependent on its co-regulators.

## Meristem maintenance and development in vegetative and reproductive phase

In *OsbZIP47KD* plants the variability in shoot meristem size, reduced size in 5 DAG seedlings while enlarged in 25 DAG seedlings, hints at the failure of compensation mechanisms that maintain meristem size. The enlarged SAM in 25 DAG *OsbZIP47KD* seedlings is superficially similar to shoot meristems of maize *fea4*, yet there are underlying subtle differences in rice knockdown plants. A detailed analysis of cell size in the SAM of *OsbZIP47KD* seedlings showed unexpected increased size in L1 cells and those underlying it that co-relates with altered SAM size. The meristem functions of Arabidopsis PAN and Maize FEA4 are independent of or are in parallel to the core CLV-WUS pathway that controls meristem size (Running and Meyerowitz 1996; Running et al. 1998; Pautler et al., 2015). The reduced



expression levels of rice *FCPI*, a *CLV3*-like gene with functions in vegetative SAM homeostasis, downregulation of *CUC1*, *APO1*, *YABBY6*, *CYP734A4* gene expression suggest several complex pathways by which *OsbZIP47* contributes to vegetative shoot meristems and lateral organ (leaf) differentiation. Interestingly our meta-analysis of genes potentially co-regulated by *OsbZIP47* and its partners (Fig. 6 Tsuda et al., 2014) point to *CYP734A4* as one of the common gene targets controlled by *OSH1*-*OsbZIP47* protein partnership. The down regulation in expression levels of this factor for BR biosynthesis in *OsZIP47KD* tissues and certain meristem phenotypes in 25 DAG meristems of *OsZIP47KD* plants and in *cyp734a4* mutant (Tsuda et al., 2014), supports a mechanism by which this partnership influences meristem and lateral primordia development. Cytokinin (CK) in conjunction with other phytohormones, auxin and Gibberellic acid is essential for cell division and organ differentiation (Leibfried et al., 2005 and Zhao et al., 2010; Su et al., 2011). Transcriptome profiling of *OsbZIP47KD* panicles shows deregulated expression levels for *Knotted1-like11*, *IPT1*, *IPT2*, *IPT8*, *GA3Ox3*, *GA2Ox4*, *GA20Ox3*, *YUCCA6* and *YUCCA7* and as well for the rice CLV-peptide family genes *FON2* and *FCPI*. We propose *OsbZIP47* functions as an integrator of the WUS-CLV and WUS-KNOX pathways for meristem development as it regulates expression levels of key factors in both pathways. Also, genes predicted to have roles floral organ primordia differentiation genes such as *OsBLH1* (BEL1-like homeodomain), *OsKANADI* and *CUC1* are deregulated in panicle tissue of *OsbZIP47KD*. Interestingly, vegetative meristem size and reproductive panicle branching phenotypes of *OsbZIP47KD* panicles resemble *apo1* and *apo2/rfl* mutants (Ikeda et al., 2005, 2007, 2009; Rao et al. 2008; Deshpande et al., 2015). Thus, the interactions between RFL and *OsbZIP47* could positively regulate the panicle meristem branch identity and its developmental transitions. A significant example of a candidate target gene for co-regulation by *ObZIP47* and RFL is *CUC1*. Further, the elevated transcript levels for *APO1* in *OsbZIP47KD* panicle tissues hints that *OsbZIP47* in the wild type panicle suppresses the expression of *APO1* which we speculate affects its partnership with *APO2/RFL*. With this we anticipate *OsbZIP47* could have evolved to regulate of some unique molecular pathways for vegetative and reproductive phase meristem growth and development.

### **Transition of Shoot apical meristem (SAM) to Inflorescence meristem (IM)**

Unlike the early flowering in long days seen in the *Arabidopsis pan* mutant, knockdown of rice *OsbZIP47* showed delayed flowering. Importantly, the latter is a common trait in mutants or knockdown transgenics in *OsMADS1*, *OSH1* and *APO2/RFL* that encode *OsbZIP47* protein partners (Jeon et al., 2000; Rao et al., 2008; Tsuda et al., 2011; Ikeda-Kawakatsu et al., 2004; Fig. 2). These observations support our hypothesis of functions for these factors in “one or more” complexes. Panicle transcript analysis in knockdown transgenics indicates *OsbZIP47* can promote flowering by fine-tuning the expression of several flowering time regulators that are upstream to florigens *Hd3a* and *RFT* (e.g., *OsLF*, *OsLBD38*, *OsLBD38*, *OsIDD6*) and by controlling expression of circadian clock-associated genes like *OsFKF1*, *OsPCL1* and *OsLHY/CCA1*. Several rice flowering time QTLs also influence grain traits (Zhu et al., 2017; Chen et al., 2014; Ma et al., 2019). The subtle effects of *OsbZIP47KD* on rice grain shape, are not reported for maize *fea4* kernels suggesting unique effects in rice grain size and shape. Our transcriptomic analysis identified a set grain shape genes: *OsLG3* (*Long Grain 3*), *GS9* (*Grain Shape Gene on Chromosome 9*), *GW7* (*Grain width QTL on chromosome 7*), *FLO2* (*Floury Endosperm 2*) as genes plausibly regulated by *OsbZIP47*. *GS9* positively controls the grain size by altering cell division along with BR signaling (Zhao et al., 2018). Interestingly, we noted high level expression of Cyclin D (*CYCD7*) in *OsbZIP47KD* panicles (Supplementary dataset S1). This is noteworthy as in *Arabidopsis* the tissue and stage specific control of this G1-S phase cell cycle gene controls cell division in different contexts, with ectopic expression driving abnormal cell division patterns (Weimer et al., 2018). Additionally another study showed tight control of cell division is important during *Arabidopsis* seed development as overexpression of *CYCD7*, which is not normally expressed in seeds, increased cell division and expansion in embryo and the endosperm (Collins et al., 2012). With this we postulate that *OsbZIP47* links flowering time, cell cycle and brassinosteroid signaling to regulate grain shape.

## **Regulation of inner floral organ identity and specification**

Consistent with *OsbZIP47* expression domain in near mature florets (Sp6-Sp8), we observed lodicule and stamen differentiation defects in *dsRNAiOsbZIP47* florets. Increased stamen numbers, with degenerated anthers on short filaments and the partial homeotic transformation of stamens to lodicules support roles for *OsbZIP47* in organ differentiation. Interestingly, in *OsbZIP47KD* florets the higher transcript abundances of *OsMADS16* (homolog of *AtAP3*) and

*DL*, a Class C function contributor in rice (Supplemental dataset S2), are indicative of some distinct effects in rice florets. Overexpression of *OsMADS16* can increased stamen numbers and form stamenoid carpels without any effects on lodicules (Lee et al., 2003). More recently, rice transgenics with a modified repressive *OsMADS16* (*OsMADS16*-SDX repressor domain fusion) generated indehiscent anthers (Sato et al., 2012). These phenotypes are akin to third whorl organ differentiation defects seen in *OsbZIP47KD* florets. Microsporogenesis in anthers of Arabidopsis flowers requires *SPOROCTELESS/NOZZLE* (*SPL/NZZ*) that is a gene target of Class, B and C organ identity factors (Ito et al., 2004). In line with these reports, we noted upregulation of *OsSPL*, possibly an effect of increased *OsMADS16* in *OsbZIP47KD* florets. Therefore, we conclude *OsbZIP47* regulates stamen differentiation by regulating Class B and *OsDL* a rice specific Class C function contributor. *FON2* and *APO1* genetically interact with *OsMADS16*; further *OsDL* and *FON2* positively regulate *OsMADS16* expression (Ikeda et al., 2007; Xu et al., 2017). In *fon2* and *apo1* loss-of-function mutants abnormal lodicules and carpels with increased number of stamens are known; whereas in their gain-of-function results in reduction of all organs correlated with reduced floret meristem size (Suzaki et al., 2006; Ikeda et al., 2009). On, comparing *OsbZIP47KD* phenotypes to those in *apo1* or *fon2*, we note opposing affects, where *FON2* and *APO1* expression levels are increased. Therefore, we propose that *OsbZIP47KD* floral stamen phenotypes are *OsMADS16* mediated and likely independent of *FON2* and perhaps is redundant with *APO1* (Ikeda et al., 2007; Xu et al., 2017).

### **Biochemical properties of OsbZIP47 can underlie its unique functions and downstream effects**

Multiple sequence alignment shows *OsbZIP47* amino acid sequences share 50% or greater identity with homologs across diverse species. A common feature among many bZIP47 proteins is a variable extended N terminal domain, except in *OsbZIP47* and Bamboo PH01000727G0540 (Supplementary Fig. S8). DNA binding activity of Arabidopsis PAN is a redox-sensitive binding due to the presence of five Cysteine (Cys) amino acids in the extended N-ter domain and the conserved C-ter Cys340 in the transcription transactivation domain (Gutsche and Zachgo, 2016). In contrast, the shorter *OsbZIP47* protein has three Cysteines (Cys17, Cys196 and Cys269). Cysteine17 of *OsbZIP47* is represented in all the monocot species, Cys 269 of *OsbZIP47* (Cys 340 of AtPAN) is conserved in all plant homologs compared here (Supplemental Fig. 8),

whereas Cys 196 is unique to OsbZIP47. Interestingly, among the proteins compared here wheat TAE56722G002 has the maximum number of 11 Cysteines. These observations hint that the number of Cys residues in this clade of bZIP proteins may have evolved for species-specific roles plausibly for the adoption of unique structures with effects on tissue-specific target gene expression. Interestingly, OsbZIP47 showed redox-dependent DNA binding despite being a short protein with reduced number of Cysteines residues. In rice OsGRX19 or MICROSPORELESS1 (OsMIL1) is the potential glutaredoxin redox enzyme for OsbZIP47 as it is the homolog of the glutaredoxin redox enzyme AtROXY1 and ZmMSCA1 from Arabidopsis and Maize (Timofejeva et al., 2013; Yang et al., 2015). Indehiscent anthers is a phenotype of common to *OsbZIP47KD* and *mill* mutant (Hong et al., 2012) leading us to propose S-glutathionylation of OsbZIP47 could be important for anther development.

Overall, we uncover conserved as well as unique roles and mechanisms of OsbZIP47 that support meristem maintenance and determinacy, in vegetative growth and reproductive development leading to grain formation. These functions make OsbZIP47 a potential locus for a potential locus for allele mining and crop improvement.

618

## 619 **Materials and Methods**

### 620 **Plasmid Constructs Generation and Rice Transformation**

621 For siRNA (interference) mediated knockdown of endogenous *OsbZIP47*, a gene-specific 226bp  
622 3'UTR DNA fragment was cloned in the sense and in the antisense orientation in same vector  
623 (pBluescript) and were separated by a 270-bp linker fragment. Subsequently, this insert was  
624 subcloned under maize ubiquitin promoter in the binary rice expression vector pUN for  
625 expression of *OsbZIP47* hairpin RNAs (Supplementary Figure S1; Prasad et al., 2001). For  
626 generating over-expression of *OsbZIP47* the full length cDNA was cloned at BamHI (blunted)-  
627 KpnI site in pUN vector to yield recombinant *pUbi::OsbZIP47* (Supplementary Figure S5).  
628 These constructs for knockdown and over-expression of *OsbZIP47* were transformed into  
629 *Agrobacterium tumefaciens* strain LB4404 and then co-cultivated with embryogenic calli from  
630 TP309 WT (*Oryza Sativa* var *japonica*) seeds as described by Prasad et al. (2001). Transgenic  
631 plants, dsRNAi *OsbZIP47* and Ox-*OsbZIP47*, were grown in IISc, Bangalore, Green house  
632 condition, ~27°C during the months of January- May and July- October each time with control  
633 wild type plants.

634

### 635 **Phenotypic characterization of knockdown transgenic**

636 dsRNAi *OsbZIP47* and Ox-*OsbZIP47* transgenic plants (T1, T2 or T3) were selected on half-  
637 strength MS medium containing 50 mg L<sup>-1</sup> hygromycin. Detailed phenotypic analysis of  
638 dsRNAi *OsbZIP47* transgenic was performed in the T3 generation and for Ox-*OsbZIP47*  
639 transgenics in T1 plants. Tissue sections (7µm, Lecia microtome; RM2045) of 5 and 25 days  
640 seedlings were stained with Eosin-Haematoxylin staining and imaged by Apotome2 Zeiss. The  
641 size of cells in the SAM was measured using ImageJ. The seedling height of dsRNAi*OsbZIP47*  
642 KD lines was measured 7 day after germination (DAG). Adult plant height, lamina joint angle,  
643 panicle length, panicle branch characteristics, spikelet numbers were measured after panicle  
644 booting. Pre-anthesis florets, from panicles prior to their emergence from the flag leaf,were  
645 imaged using Leica Wild M3Z stereomicroscope.

646

647

## RNA-Sequencing and RT-qPCR

Next generation Sequencing (NGS) of RNA from *OsbZIP47* KD panicles (0.1cm-0.5cm) was done for two biological replicates with matched WT panicles tissues as controls. The total RNA was extracted using Trizol Reagent (Sigma) according to manufacturer instructions. 1µg total RNA was used for library preparation using rRNA depletion-based NEB Next UltraII RNA kit. NGS was performed using Illumina Hi-Seq, pair-end 2X150bp chemistry. After quality check (using FastQC and multiQC software) the reads were mapped against indexed *Oryza sativa* ssp. *japonica* cv. reference genome (RAP-DB; <https://rapdb.dna.affrc.go.jp/>) using STAR2 (v2.5.3a). Further differential gene expression (DGE) of read counts between wild type and transgenic were computed using edgeR (v3.28.0) package with the absolute log2 fold change  $\geq 1$  and  $\leq -1$  with p-value  $\leq 0.05$ . For real-time qPCR experiments oligo(dT)-primed cDNAs were synthesized using 2ug of total RNA with MMLV (reverse transcriptase, NEB). qRT-PCR reactions were set up with 50-70ng of cDNA, 250 nM gene-specific primers and FastStart Universal Sybr Green Master (Rox) mix (Roche) in CFX384 real-time system (Biorad) or Applied Biosystems ViiA 7 system. Fold change in transcript levels for deregulated genes was calculated as difference in cycle threshold value between knockdown transgenic and wild type. To obtain normalized threshold value ( $\Delta\Delta Ct$ ) first  $\Delta Ct$  value was calculated by subtracting the Ct value for internal control, *Ubiquitin5* from the Ct value for each gene of interest (Gene Ct-Ubi5 Ct). Then  $\Delta\Delta Ct$  was calculated by subtracting the wild type  $\Delta Ct$  value from the  $\Delta Ct$  value obtained for transgenic tissue. The fold change was calculated as  $2^{-(\Delta\Delta Ct)}$ . Primers used and their sequences are given in Supplemental Table S2.

## RNA In Situ Hybridization

To generate *OsbZIP47* riboprobes, a gene-specific 226bp DNA fragment from 3'UTR (1329-1555 bp) was PCR amplified and cloned in the pBluescript KS+ vector. Sense and antisense Digoxigenin-labeled (DIG-UTP, Roche) riboprobes were prepared by *invitro* transcription using T3 and T7 RNA polymerases (NEB), respectively. Tissue processing and probe hybridizations was done in Prasad et al. (2005). Signal was developed using anti-digoxigenin-alkaline



phosphatase (AP) conjugated antibodies (Roche) and BCIP (5-Bromo-4-chloro-3-indolyl phosphate)- NBT (nitro blue tetrazolium) chromogenic substrates (Roche). Images were captured by Apotome2 Zeiss microscope system.

### **Bacterial Expression of OsbZIP47 FL protein and studies of oligomeric status**

For OsbZIP47 protein expression and purification from bacteria, *OsbZIP47* full-length (FL) CDS and *OsbZIP47* DBD (240-582bp) was first cloned in the pET32a vector. Thioredoxin-His-tagged OsbZIP47FL and OsbZIP47DBD proteins were expressed from Rosetta (DE3) bacterial strain induced with 0.2 mM IPTG (Isopropyl  $\beta$ - d-1-thiogalactopyranoside) for 3 h at 37°C. Oligomeric states of OsbZIP47 protein was determined by analytical size exclusion chromatography (SEC) performed at 4°C on a Superdex 200 increase column (GE Healthcare *Inc.*) pre-equilibrated with buffer (25 mM sodium phosphate (pH 7.4) 100 mM NaCl and 5% glycerol). Approximately 400  $\mu$ g protein, (~2mg/ml) was injected into AKTA purifiers (GE healthcare *Inc.*) connected to the column. The flow rate was maintained at 0.3 ml/min and the protein elution profile was at 220 nm. The molecular weight was calculated using a standard plot. Molecular weight was calculated using the equation:

$Y = -0.602X + 4.6036$ , where,  $Y = V_e/V_o$  ( $V_e$ =Elution volume;  $V_o$ = Void volume) and  $X$ = Log of molecular weight in Dalton.

### **Electrophoretic mobility shift assays (EMSA)**

*E coli* rosetta (DE3) bacterial lysates with the Trx-His-OsbZIP47 FL and OsbZIP47-DBD proteins were prepared in the buffer: 10mM HEPES-KOH, pH 7.8, 50mM NaCl, 0.5% Nonidet P-40, 0.5 mM EDTA, 1 mM MgCl<sub>2</sub>, 10%glycerol, 0.5 mM DTT, and 1x protease inhibitors cocktail (Sigma). 1-4 $\mu$ l lysate was incubated with 5'end P<sup>32</sup> labelled DNA oligonucleotide probes for 30 minutes at 4°C in 1x EMSA buffer (20mM HEPES-KOH pH 7.8, 100 mM KCl, 2mM DTT, 1mM EDTA, 0.1% BSA, 10ng Herring sperm DNA, 10% Glycerol, 1X Protease Inhibitor cocktail) in a 15 $\mu$ l reaction volume. The binding reaction was resolved on a 8% native-PAGE gel in 0.5x Tris-borate EDTA (TEB) buffer at room temperature. The gel was analyzed by autoradiography in a phosphorimager (GE; Typhoon FLA 9500). The sequences of the EMSA probes are listed in Supplemental Table S2.

### **Yeast Two-Hybrid assays**

The full length CDS of *OsbZIP47* was amplified from KOME clone AK109719 using gene-specific primers and cloned into pBSKS vector. After verification by restriction digestions and sequencing, it was subsequently cloned into yeast two hybrid vectors, pGBDUC1 and pGADC1. Similarly, all the CDS fragments that would encode prey proteins such as OsMADS1, OsETTIN1/2, RFL, OSH1 and OsMADS15 were PCR amplified from either KOME cDNA clones or from cDNA made from panicle tissue RNA, and sub-cloned into destination pGBDUC1 and pGADC-1 Y2H vectors. The bait clone pGBDUC1Os**ZIP47** and indicated prey clones in pGADC1 vector were co-transformed into the yeast pJ69-4A Y2H strain (James et al., 1996) using the lithium acetate (LiAc) method. Transformants were selected on synthetic drop out media lacking Leucine and Uracil. Protein interactions were assessed in at least five purified transformants by serial dilution spotting of broth cultures onto SD/-Leu-Ura-His plates supplemented with 5mM of 3AT and by the ONPG assay (Supplemental Material and methods).

### **Bimolecular fluorescence complementation assays (BiFC)**

*OsbZIP47* cDNA with a truncated C domain (amino acid 199-385) was cloned into pSPYCE (M) (C-terminal fusion) and pSPYNE (R) 173 (N-terminal fusion) BiFC vectors (Waadt et al., 2008). Similarly, the full-length CDS encoding prey proteins such as OsMADS1, OsETTIN1/2, RFL, OSH1 and OsMADS15 were subcloned into pSPYNE (R) 173 vector. Six combinations of cEYFP and nEYFP fusions, including positive and negative controls, were transiently co-expressed in onion (*Allium cepa*) epidermal cells by *A. tumefaciens* (C58C1) infiltration as described in Xu et al. (2014). Co-transformed tissues were incubated at 25°C in dark for 48 h before being assayed for YFP activity. Fluorescence images were screened using a confocal laser microscope (Zeiss LSM880, Airyscan) with 2AU 480nm excitation and 520nm emission for detection of YFP signal.

### **Meta-analysis**

The published transcriptome datasets in dsRNAi**OsMADS1** and dsRNAi**RFL** panicles were adopted in this study to compare with that of *OsbZIP47KD* transcriptome dataset. The differentially expressed genes from each dataset was taken up for pair wise comparison to identify unique, or commonly (up-regulated, or down-regulated) downstream genes. The



deregulated genes were also correlated with the published data on OSH1 genome-wide binding (Supplemental Material and methods).

## SUPPLEMENTAL DATA

**Supplemental Figure S1.** Schematic of T-DNA segment in the *pUbi:OsZIP47*-RNAi construct and assessment of knockdown of *OsZIP47* transcripts in transgenic line.

**Supplemental Figure S2.** Comparison of cell number in the L1 of 5 and 25 day old vegetative SAM tissues from in wild type vs. *OsZIP47KD* seedlings.

**Supplemental Figure S3.** Spatial expression patterns of *H4*-Histone transcripts in 5 and 25-day SAM of wild type and *OsZIP47KD* seedlings.

**Supplemental Figure S4.** Floral phenotypes of *OsZIP47 KD* plants.

**Supplemental Figure S5.** Generation of *OsZIP47* overexpression lines and phenotype in T1 generation plants.

**Supplemental Figure S6.** Comparative spatial expression of *OsZIP47* with *OSH1* in panicles, spikelets and florets.

**Supplemental Figure S7.** Volcano plot and Gene Ontology pathway enrichment analysis of *OsZIP4KD* transcriptome data.

**Supplemental Figure S8.** Multiple Sequence Alignment of *OsZIP47* with its orthologues showing conserved and non-conserved amino acid residues.

**Supplemental Table S1.** Quantifying phenotypes of *OsZIP47* knockdown line #14 in the T3 generation

**Supplemental Table S2.** List of primers/Oligonucleotides used in this study.

**Supplemental Data Set S1.** List of genes deregulated by 2-fold ( $P < 0.05$ ) in *OsZIP47KD* line as compared to the wild type transcriptome.

**Supplemental Data Set S2.** List of DEGs for Gene Ontology Enrichment Analysis.

**Supplemental Data Set S3.** List of genes co-regulated by *OsZIP47*, *OsMADS1* and *RFL*, bound/unbound by *OSH1*.

## ACKNOWLEDGEMENTS

This work was funded by the Department of Biotechnology, Ministry of Science & Technology, Government of India Project entitled “Functional Analysis of Gene Regulatory Networks during Flower and Seed development in rice”, Project number: BT/AB/FG-1 (PH-II)/2009 to U.V.R. Funding to RR was from the UGC DSK fellowship: Project ID:No.F.4-2/2006 (BSR)/BL/1718/0151) and student fellowship to RP was from Indian Institute of Science. The infrastructure support for greenhouse facilities, confocal microscopy and phosphorimager was from DBT-IISc partnership program Phase II and this is gratefully acknowledged. Inputs of Dr. Grace Chongloi and from members of the UVR laboratory during the course of the study are also acknowledged. Ms Divya is thanked for assistance with confocal imaging and Mr Murthy, Mr Jagadeesh are thanked for assistance in plant growth and care.

## FIGURE LEGENDS

### Figure 1. *OsbZIP47* knockdown (KD) vegetative phenotypes.

(A) Schematic representation of *dsRNAiOsbZIP47* transgene T-DNA segment. (B) Seedling height of 8 day *OsbZIP47KD* plants is shorter than that of wild type (*WT*) plants. Scale bar =1 cm. (C) Seedling plant height data shown as mean  $\pm$  s.d., Student’s *t* tests, \*\*\**P*< 0.0001, n=30. (D) and (E) Comparison of SAM area in *OsbZIP47KD* vs. *WT* in 5 DAG (days after germination) and 25 DAG seedlings. SAM area, marked by red outline in panels i, ii, iv, and v, is reduced in 5 DAG *OsbZIP47KD* seedlings but is increased in 25 DAG seedlings. Scale bar in i, ii, iv, and v are 50  $\mu$ M, and iii and vi are 20  $\mu$ M. Data is shown as mean  $\pm$  s.d. Student’s *t* tests, \**P*< 0.01, \*\**P*< 0.001, n=10. (F) Comparison of cell size in the apical region, the internal underlying apical L1 and in the peripheral zone of the meristem. The average of 5 cells was taken as a data point for a single section and 10-12 different sections were taken for statistical analysis. Asterisks indicate significant differences from wild type at \* *P*<0.01, in 5 DAG SAM, \*\*\* *P*<0.0003 in 25 DAG SAM tissues respectively. NS denotes non-significant difference. (G) RT-qPCR analyses of *CUC1*, *AP01*, *FCP1*, *FON2*, *CYP734A2*, *CYP734A4*, *CYP734A6*, *YUCCA6*, *FLR2* and *FON2* transcripts from candidate targets in SAM from 25 DAG seedlings. Fold change values were determined by comparing the normalized expression levels in *OsbZIP47KD* plants to *WT* plants.

**Figure 2. Phenotypic effects of *OsZIP47KD* on plant growth and floral transition.**

(A) Flowering timing (SAM to Inflorescence Meristem/ panicle meristem transition) in *OsZIP47KD* plants is delayed by ~22days as compared to the *WT*. White arrow indicates the booted panicle in *WT* and red arrow points the absence of the booted panicle in a *OsZIP47KD* plant of the same age. (B) Plant height in mature flowering plants shows as compared to the *WT*, *OsZIP47KD* plants are shorter. Quantitation of heading dates (C) plant height (D) and panicle rachis length (E) in *WT* and *OsZIP47KD* plants. Data are shown as the mean  $\pm$  s.d. (Student's t tests,  $**P < 0.01$ ,  $n = 10$ ). (F) Internodes in mature flowering *WT* and *OsZIP47KD* plants are displayed and are numbered I to V from the apical end. P is the panicle bearing node and internode. Bar, 2.5 cm. Shorter internodes I to V in *OsZIP47KD* contributes to the reduced height.

**Figure 3. Floret organ numbers and organ development in *OsZIP47KD* plants.**

(A) Shorter panicle *OsZIP47KD* with reduced number of primary branches and spikelet number per panicle as compared to wild type plant. (B) and (C), Flag leaf angle in fully headed panicles of mature plants show increased lamina joint angle in *OsZIP47KD* plant as compared to the *WT*. (D) *WT* floret organs shown after removal of lemma and the spikelet sterile lemmas. Red arrow points to the pair of lodicules and yellow asterisks to the six normal stamens. (E-H), Organ phenotypes in *OsZIP47KD* florets. (E) Floret with 7 stamens (yellow asterisks) with normal filaments and anthers. (F) Floret with mildly deformed lodicule (red arrowhead), two of the six normal stamens (others were dissected out) and a chimeric second whorl organ with lodicule and stamenoid tissues (red asterisk). (G) Floret with deformed lodicule and 7 normal stamens (yellow asterisk). (H) Floret with slightly deformed lodicule, short stamens and shrunken anthers (red asterisk), two near normal stamens (yellow asterisk). (I) and (J), Grain morphology in *OsZIP47KD* and *WT* plants. The length/width (L/W) ratio of *OsZIP47KD* seeds was lower than *WT* seeds, suggesting increased grain width. Scale bar =1cm in panels in A to I. (J-M), Statistical analysis (mean  $\pm$  s. d.) of grain shape, lamina joint angle, primary branch number, number of spikelets per panicles. Data in J ( $n=40$  in J), K ( $n=10$ ), L ( $n=11$ ), M ( $n=9$ ), Student's t tests,  $**P < 0.01$ ,  $***P < 0.001$ .

**Figure 4. Spatial distribution of *OsZIP47* transcripts in meristems and florets.**

(A and B) *OsZIP47* *in situ* RNA hybridization signal in SAM tissues from 5 DAG and 25 seedlings. Expression in SAM with slightly higher signal in emerging leaf primordia. (C and D) Inflorescence meristem (IM) with emerging primary branch meristems show expression of *OsZIP47* in the elongation meristem and primary branch meristems (prb) and secondary branch meristems (srb) and in young leaves. (E) *OsZIP47* transcripts in very early floret meristem (FM) with uniform spatial distribution of signal. (F) Floret uniform signal in the well-formed stamens (st), lemma/ palea (le and pa) organ primordia and in the central early carpel primordia. (G) High level *OsZIP47* expression in the lodicule and in stamens, lower signal in the near mature lemma and palea. (H) *OsZIP47* transcripts in the ovary wall and ovule. (I and J) SAM in 5 DAG and 25 DAG plants probe with sense probe as a negative control. (K and L) IM and near mature floret respectively probed with sense RNA.

**Figure 5. Interaction of *OsZIP47* with other meristem factors.**

(A) Yeast two hybrid (Y2H) assays with *OsZIP47* $\Delta$ C protein (lacking 186-380 amino acids in C terminal) and predicted protein partners such as OsMADS1 (MIKC14 domain), RFL, OsETTIN1, OsETTIN2 and OSH1. Serial dilutions of yeast cells (PJ694A) spotted on media lacking histidine and supplemented with 5mM 3-AT. Growth after five days at 30 °C is shown. (B) Quantitative  $\beta$ -galactosidase activity assay of the indicated interaction pairs. ONPG was used as a substrate for detection of *lacZ* reporter gene expression levels and absorbance was determined at 420 nm. Yeast transformants with OsMADS15 in pGBDUC1 vector and OsMADS1 MIKC14 in pGADC1vector served as positive control for protein interaction. A combination of pGADC1 and pGBDUC1 empty vectors (without protein fusion) was the negative control. (C) Validation of yeast two hybrid protein interactions by Bimolecular fluorescence complementation (BiFC) assays in onion epidermal cells. YFP fluorescence was detected when *OsZIP47* $\Delta$ C-cYFP fusion protein was co-expressed with OsMADS1-nYFP, RFL-nYFP, and OSH1 nYFP. Absence of YFP fluorescence in the negative control i.e., *OsZIP47* $\Delta$ CYC and YN domain alone was the negative control. Bars=50  $\mu$ m.

**Figure 6. Differentially expressed genes (DEGs) and a GO enrichment analysis of pathways downstream to *OsZIP47*.**

Enrichment networks depicting pathways regulated by OsbZIP47. (A) positively regulated, and (B) Negatively regulated pathways. The green and red color nodes represent enriched and depleted functional categories respectively ( $P < 0.05$ ). The size and color intensity of the node correlates with the over-representation of genes within the given class. (C) Enrichment map of transcription factor (TF) genes shows those encoding members from bHLH, G2-like, C2H2 zinc finger, TCP, Trihelix are underrepresented, whereas TFs such as AP2/EREBP, MYB-related, NAC domain, TAZ, WRKY, bZIP were overrepresented. (D) Enrichment analysis of genes for phytohormone metabolism and signaling. Cytokinin, Ethylene, Gibberellin pathways were enriched in negatively regulated dataset, whereas, Absciscic acid, Gibberellin, and Jasmonate pathways predominate in the positively regulated set. (E) RT-qPCR analysis of the relative fold change for transcripts from several candidate target genes of OsZIP47 in 0.1 to 0.5 cm panicles from *OsbZIP47KD* as compared to *WT* tissues. The normalization of transcript level of each gene was done using *UBQ5* transcript levels. Error bars represents the standard deviation. (F) Venn diagram showing unique and overlapping sets of differentially expressed genes derived from *OsMADS1*, *OsbZIP47* and *RFL* transcriptome datasets (Rao et al. 2008; Khanday et al., 2013 and this study). (G) Genes implicated to be coregulated by *OsMADS1*, *OsbZIP47*, and *RFL* and bound by *OSH1* (Rao et al. 2008; Khanday et al., 2013; Tsuda et al., 2014 and this study).

# **Figure 7. OsbZIP47 oligomerisation and the effects of its redox status on DNA binding.**

(A) Size-exclusion chromatography (SEC) profile for OsbZIP47 protein/oligomer on a Superdex 200 increase column. (B) Mobility of purified OsbZIP47-Trx protein on non-reducing 10% SDS-PAGE after treatment with 2mM diamide (an oxidizing agent), or with 20mM DTT (a reducing agent), or with 2mM diamide followed by 20mM DTT. (C) Schematic representation of the *FCPI* gene locus. Exons are open white boxes, introns are shown as black lines, and the predicted *cis* motifs for bZIP DNA binding domain (DBD) are represented as inverted triangles. The DNA binding properties of OsbZIP47FL and partial OsbZIP47DBD proteins was tested for the TGACGT *cis* motif located at -371bp of *FCPI* (marked with a filled inverted triangle). (D and E) EMSA assays with full-length OsbZIP47 (62Kda protein) as compared to the partial protein of 34.3Kda containing OsbZIP47 DBD. Retarded mobility of DNA-protein complexes

894 (red arrow) for the *FCPI* target site is indicated. Unbound dsDNA oligonucleotide are at the  
895 bottom.

896

897

898

899

900

901

## Parsed Citations

**Agrawal, G.K., Abe, K., Yamazaki, M., Miyao, A., and Hirochika, H. (2005).** Conservation of the E-function for floral organ identity in rice revealed by the analysis of tissue culture-induced loss-of-function mutants of the *OsMADS1* gene. *Plant Mol Biol* 59, 125-135.

Google Scholar: [Author Only](#) [Title Only](#) [Author and Title](#)

**Bolduc, N., and Hake, S. (2009).** The maize transcription factor *KNOTTED1* directly regulates the gibberellin catabolism gene *ga2ox1*. *Plant Cell* 21, 1647-1658.

Google Scholar: [Author Only](#) [Title Only](#) [Author and Title](#)

**Bommert, P., Lunde, C., Nardmann, J., Vollbrecht, E., Running, M., Jackson, D., Hake, S., and Werr, W. (2005).** thick tassel dwarf1 encodes a putative maize ortholog of the Arabidopsis *CLAVATA1* leucine-rich repeat receptor-like kinase. *Development* 132, 1235-1245.

Google Scholar: [Author Only](#) [Title Only](#) [Author and Title](#)

**Bommert, P., Nagasawa, N.S., and Jackson, D. (2013).** Quantitative variation in maize kernel row number is controlled by the *FASCIATED EAR2* locus. *Nat Genet* 45, 334-337.

Google Scholar: [Author Only](#) [Title Only](#) [Author and Title](#)

**Bommert, P., Satoh-Nagasawa, N., Jackson, D., and Hirano, H.Y. (2005).** Genetics and evolution of inflorescence and flower development in grasses. *Plant Cell Physiol* 46, 69-78.

Google Scholar: [Author Only](#) [Title Only](#) [Author and Title](#)

**Brand, U., Grunewald, M., Hobe, M., and Simon, R. (2002).** Regulation of *CLV3* expression by two homeobox genes in Arabidopsis. *Plant Physiol* 129, 565-575.

Google Scholar: [Author Only](#) [Title Only](#) [Author and Title](#)

**Busch, M.A., Bomblies, K., and Weigel, D. (1999).** Activation of a floral homeotic gene in Arabidopsis. *Science* 285, 585-587.

Google Scholar: [Author Only](#) [Title Only](#) [Author and Title](#)

**Cai, Q., Yuan, Z., Chen, M., Yin, C., Luo, Z., Zhao, X., Liang, W., Hu, J., and Zhang, D. (2014).** Jasmonic acid regulates spikelet development in rice. *Nat Commun* 5, 3476.

Google Scholar: [Author Only](#) [Title Only](#) [Author and Title](#)

**Callens, C., Tucker, M.R., Zhang, D., and Wilson, Z.A. (2018).** Dissecting the role of MADS-box genes in monocot floral development and diversity. *J Exp Bot* 69, 2435-2459.

Google Scholar: [Author Only](#) [Title Only](#) [Author and Title](#)

**Chongloi, G.L., Prakash, S., and Vijayraghavan, U. (2019).** Regulation of meristem maintenance and organ identity during rice reproductive development. *J Exp Bot* 70, 1719-1736.

Google Scholar: [Author Only](#) [Title Only](#) [Author and Title](#)

**Chu, H., Qian, Q., Liang, W., Yin, C., Tan, H., Yao, X., Yuan, Z., Yang, J., Huang, H., Luo, D., Ma, H., and Zhang, D. (2006).** The floral organ number4 gene encoding a putative ortholog of Arabidopsis *CLAVATA3* regulates apical meristem size in rice. *Plant Physiol* 142, 1039-1052.

Google Scholar: [Author Only](#) [Title Only](#) [Author and Title](#)

**Chuang, C.F., Running, M.P., Williams, R.W., and Meyerowitz, E.M. (1999).** The *PERANTHIA* gene encodes a bZIP protein involved in the determination of floral organ number in Arabidopsis thaliana. *Genes Dev* 13, 334-344.

Google Scholar: [Author Only](#) [Title Only](#) [Author and Title](#)

**Chen, J. Y., Guo, L., Ma, H., Chen, Y. Y., Zhang, H. W., Ying, J. Z., & Zhuang, J. Y. (2014).** Fine mapping of qHd1, a minor heading date QTL with pleiotropism for yield traits in rice (*Oryza sativa* L.) Theoretical and Applied Genetics. 127, 2515–2524.

Google Scholar: [Author Only](#) [Title Only](#) [Author and Title](#)

**Collins, C., Dewitte, W., Murray, J.M.H. (2012).** D-type cyclins control cell division and developmental rate during Arabidopsis seed development. *J Exp Bot* 63, 3571–3586.

Google Scholar: [Author Only](#) [Title Only](#) [Author and Title](#)

**Dai, Z., Wang, J., Yang, X., Lu, H., Miao, X., Shi, Z. (2018)** Modulation of plant architecture by the miR156f-OsSPL7-OsGH3.8 pathway in rice. *J Exp Bot* 69, 5117–5130

Google Scholar: [Author Only](#) [Title Only](#) [Author and Title](#)

**Das, P., Ito, T., Wellmer, F., Vernoux, T., Dedieu, A., Traas, J., and Meyerowitz, E.M. (2009).** Floral stem cell termination involves the direct regulation of *AGAMOUS* by *PERANTHIA*. *Development* 136, 1605-1611.

Google Scholar: [Author Only](#) [Title Only](#) [Author and Title](#)

**Deshpande, G.M., Ramakrishna, K., Chongloi, G.L., and Vijayraghavan, U. (2015).** Functions for rice RFL in vegetative axillary meristem specification and outgrowth. *J Exp Bot* 66, 2773-2784.

Google Scholar: [Author Only](#) [Title Only](#) [Author and Title](#)

**Dodsworth, S. (2009).** A diverse and intricate signalling network regulates stem cell fate in the shoot apical meristem. *Dev Biol* 336, 1-9.

Google Scholar: [Author Only](#) [Title Only](#) [Author and Title](#)



**Fambrini, M., and Pugliesi, C. (2013). Usual and unusual development of the dicot leaf: involvement of transcription factors and hormones. Plant Cell Rep 32, 899-922.**

Google Scholar: [Author Only](#) [Title Only](#) [Author and Title](#)

**Gordon, S.P., Chickarmane, V.S., Ohno, C., and Meyerowitz, E.M. (2009). Multiple feedback loops through cytokinin signaling control stem cell number within the Arabidopsis shoot meristem. Proc Natl Acad Sci U S A 106, 16529-16534.**

Google Scholar: [Author Only](#) [Title Only](#) [Author and Title](#)

**Gui, J., Liu, C., Shen, J., and Li, L. (2014). Grain setting defect1, encoding a remorin protein, affects the grain setting in rice through regulating plasmodesmatal conductance. Plant Physiol 166, 1463-1478.**

Google Scholar: [Author Only](#) [Title Only](#) [Author and Title](#)

**Gutsche, N., and Zachgo, S. (2016). The N-Terminus of the Floral Arabidopsis TGA Transcription Factor PERIANTHIA Mediates Redox-Sensitive DNA-Binding. PLoS One 11, e0153810.**

Google Scholar: [Author Only](#) [Title Only](#) [Author and Title](#)

**Harder, L.D. and Prusinkiewicz, P. (2013). The interplay between inflorescence development and function as the crucible of architectural diversity. Ann Bot 112, 1477-1493.**

Google Scholar: [Author Only](#) [Title Only](#) [Author and Title](#)

**Hong, L., Tang, D., Zhu, K., Wang, K., Li, M., Cheng, Z. (2012) Somatic and Reproductive Cell Development in Rice Anther Is Regulated by a Putative Glutaredoxin. Plant Cell 24, 577-588**

Google Scholar: [Author Only](#) [Title Only](#) [Author and Title](#)

**Ikeda, K., Ito, M., Nagasawa, N., Kyojuka, J., and Nagato, Y. (2007). Rice ABERRANT PANICLE ORGANIZATION 1, encoding an F-box protein, regulates meristem fate. Plant J 51, 1030-1040.**

Google Scholar: [Author Only](#) [Title Only](#) [Author and Title](#)

**Ikeda, K., Nagasawa, N., and Nagato, Y. (2005). ABERRANT PANICLE ORGANIZATION 1 temporally regulates meristem identity in rice. Dev Biol 282, 349-360.**

Google Scholar: [Author Only](#) [Title Only](#) [Author and Title](#)

**Ikeda-Kawakatsu, K., Maekawa, M., Izawa, T., Itoh, J., and Nagato, Y. (2012). ABERRANT PANICLE ORGANIZATION 2/RFL, the rice ortholog of Arabidopsis LEAFY, suppresses the transition from inflorescence meristem to floral meristem through interaction with APO1. Plant J 69, 168-180.**

Google Scholar: [Author Only](#) [Title Only](#) [Author and Title](#)

**Ikeda-Kawakatsu, K., Yasuno, N., Oikawa, T., Iida, S., Nagato, Y., Maekawa, M., and Kyojuka, J. (2009). Expression level of ABERRANT PANICLE ORGANIZATION1 determines rice inflorescence form through control of cell proliferation in the meristem. Plant Physiol 150, 736-747.**

Google Scholar: [Author Only](#) [Title Only](#) [Author and Title](#)

**Ito, T., Wellmer, F., Yu, H., Das, P., Ito, N., Alves-Ferreira, M., Riechmann, J.L., and Meyerowitz, E.M. (2004). The homeotic protein AGAMOUS controls microsporogenesis by regulation of SPOROCTELESS. Nature 430, 356-360.**

Google Scholar: [Author Only](#) [Title Only](#) [Author and Title](#)

**Iwamoto, M., Kiyota, S., Hanada, A., Yamaguchi, S., and Takano, M. (2011). The multiple contributions of phytochromes to the control of internode elongation in rice. Plant Physiol 157, 1187-1195.**

Google Scholar: [Author Only](#) [Title Only](#) [Author and Title](#)

**James, P., Halladay, J., and Craig, E.A. (1996). Genomic libraries and a host strain designed for highly efficient two-hybrid selection in yeast. Genetics 144, 1425-1436.**

Google Scholar: [Author Only](#) [Title Only](#) [Author and Title](#)

**Jasinski, S., Piazza, P., Craft, J., Hay, A., Woolley, L., Rieu, I., Phillips, A., Hedden, P., and Tsiantis, M. (2005). KNOX action in Arabidopsis is mediated by coordinate regulation of cytokinin and gibberellin activities. Curr Biol 15, 1560-1565.**

Google Scholar: [Author Only](#) [Title Only](#) [Author and Title](#)

**Je, B.I., Xu, F., Wu, Q., Liu, L., Meeley, R., Gallagher, J.P., Corcilus, L., Payne, R.J., Bartlett, M.E., and Jackson, D. (2018). The CLAVATA receptor FASCIATED EAR2 responds to distinct CLE peptides by signaling through two downstream effectors. Elife**

Google Scholar: [Author Only](#) [Title Only](#) [Author and Title](#)

**doi: 10.7554/eLife.35673.**

Google Scholar: [Author Only](#) [Title Only](#) [Author and Title](#)

**Jeon, J., Lee, S., Jung, K., Jung, K., Yang, W., Yi, G., Oh, B., and An, G. (2000b) Production of transgenic rice plants showing reduced heading date and plant height by ectopic expression of rice MADS-box genes. Molecular Breeding 6, 581-592.**

Google Scholar: [Author Only](#) [Title Only](#) [Author and Title](#)

**Kerstetter, R.A., Laudencia-Chinguanco, D., Smith, L.G., and Hake, S. (1997). Loss-of-function mutations in the maize homeobox gene, knotted1, are defective in shoot meristem maintenance. Development 124, 3045-3054.**

Google Scholar: [Author Only](#) [Title Only](#) [Author and Title](#)



**Khanday, I., Das, S., Chongloi, G.L., Bansal, M., Grossniklaus, U., and Vijayraghavan, U. (2016). Genome-Wide Targets Regulated by the OsMADS1 Transcription Factor Reveals Its DNA Recognition Properties. Plant Physiol 172, 372-388.**

Google Scholar: [Author Only](#) [Title Only](#) [Author and Title](#)

**Khanday, I., Yadav, S.R., and Vijayraghavan, U. (2013). Rice LHS1/OsMADS1 controls floret meristem specification by coordinated regulation of transcription factors and hormone signaling pathways. Plant Physiol 161, 1970-1983.**

Google Scholar: [Author Only](#) [Title Only](#) [Author and Title](#)

**Kim, E.H., Kim, Y.S., Park, S.H., Koo, Y.J., Cho, Y.D., Chung, Y.Y., Lee, I.J., Kim, J.K. (2009) Methyl jasmonate reduces grain yield by mediating stress signals to alter spikelet development in rice. Plant Physiol 149, 1751-1760:**

Google Scholar: [Author Only](#) [Title Only](#) [Author and Title](#)

**Komatsu, M., Chujo, A., Nagato, Y., Shimamoto, K., and Kozuka, J. (2003). FRIZZY PANICLE is required to prevent the formation of axillary meristems and to establish floral meristem identity in rice spikelets. Development 130, 3841-3850.**

Google Scholar: [Author Only](#) [Title Only](#) [Author and Title](#)

**Komatsu, M., Maekawa, M., Shimamoto, K., and Kozuka, J. (2001). The LAX1 and FRIZZY PANICLE 2 genes determine the inflorescence architecture of rice by controlling rachis-branch and spikelet development. Dev Biol 231, 364-373.**

Google Scholar: [Author Only](#) [Title Only](#) [Author and Title](#)

**Komiyama, R., Ikegami, A., Tamaki, S., Yokoi, S., and Shimamoto, K. (2008). Hd3a and RFT1 are essential for flowering in rice. Development 135, 767-774.**

Google Scholar: [Author Only](#) [Title Only](#) [Author and Title](#)

**Komiyama, R., Yokoi, S., and Shimamoto, K. (2009). A gene network for long-day flowering activates RFT1 encoding a mobile flowering signal in rice. Development 136, 3443-3450.**

Google Scholar: [Author Only](#) [Title Only](#) [Author and Title](#)

**Kurakawa, T., Ueda, N., Maekawa, M., Kobayashi, K., Kojima, M., Nagato, Y., Sakakibara, H., and Kozuka, J. (2007). Direct control of shoot meristem activity by a cytokinin-activating enzyme. Nature 445, 652-655.**

Google Scholar: [Author Only](#) [Title Only](#) [Author and Title](#)

**Kozuka, J., and Shimamoto, K. (2002). Ectopic expression of OsMADS3, a rice ortholog of AGAMOUS, caused a homeotic transformation of lodicules to stamens in transgenic rice plants. Plant Cell Physiol 43, 130-135.**

Google Scholar: [Author Only](#) [Title Only](#) [Author and Title](#)

**Lee, B.H., Johnston, R., Yang, Y., Gallavotti, A., Kojima, M., Travencolo, B.A., Costa Lda, F., Sakakibara, H., and Jackson, D. (2009). Studies of aberrant phyllotaxy1 mutants of maize indicate complex interactions between auxin and cytokinin signaling in the shoot apical meristem. Plant Physiol 150, 205-216.**

Google Scholar: [Author Only](#) [Title Only](#) [Author and Title](#)

**Lee, D.Y., and An, G. (2012). Two AP2 family genes, supernumerary bract (SNB) and Osindeterminate spikelet 1 (OsIDS1), synergistically control inflorescence architecture and floral meristem establishment in rice. Plant J 69, 445-461.**

Google Scholar: [Author Only](#) [Title Only](#) [Author and Title](#)

**Lee, S., Jeon, J.S., An, K., Moon, Y.H., Chung, Y.Y., and An, G. (2003). Alteration of floral organ identity in rice through ectopic expression of OsMADS16. Planta 217, 904-911.**

Google Scholar: [Author Only](#) [Title Only](#) [Author and Title](#)

**Leibfried, A., To, J.P., Busch, W., Stehling, S., Kehle, A., Demar, M., Kieber, J.J., and Lohmann, J.U. (2005). WUSCHEL controls meristem function by direct regulation of cytokinin-inducible response regulators. Nature 438, 1172-1175.**

Google Scholar: [Author Only](#) [Title Only](#) [Author and Title](#)

**Lenhard, M., Bohnert, A., Jurgens, G., and Laux, T. (2001). Termination of stem cell maintenance in Arabidopsis floral meristems by interactions between WUSCHEL and AGAMOUS. Cell 105, 805-814.**

Google Scholar: [Author Only](#) [Title Only](#) [Author and Title](#)

**Li, S., Lauri, A., Ziemann, M., Busch, A., Bhave, M., & Zachgo, S. (2009). Nuclear activity of ROXY1, a glutaredoxin interacting with TGA factors, is required for petal development in Arabidopsis thaliana. Plant Cell, 21, 429-441.**

Google Scholar: [Author Only](#) [Title Only](#) [Author and Title](#)

**Li, C., Wang, L., Cui, Y., He, L., Qi, Y., Zhang, J., Lin, J., Liao, H., Lin, Q., Yang, T., Yu, F., & Liu, X. (2016). Two FERONIA-like receptor (FLR) genes are required to maintain architecture, fertility, and seed yield in rice. Mol Breeding, 36, 151.**

Google Scholar: [Author Only](#) [Title Only](#) [Author and Title](#)

**Lim, J., Moon, Y.H., An, G., and Jang, S.K. (2000). Two rice MADS domain proteins interact with OsMADS1. Plant Mol Biol 44, 513-527.**

Google Scholar: [Author Only](#) [Title Only](#) [Author and Title](#)

**Liu, X., Kim, Y.J., Muller, R., Yumul, R.E., Liu, C., Pan, Y., Cao, X., Goodrich, J., and Chen, X. (2011). AGAMOUS terminates floral stem cell maintenance in Arabidopsis by directly repressing WUSCHEL through recruitment of Polycomb Group proteins. Plant Cell 23, 3654-3670.**

Google Scholar: [Author Only](#) [Title Only](#) [Author and Title](#)

**Lohmann, J.U., Hong, R.L., Hobe, M., Busch, M.A., Parcy, F., Simon, R., and Weigel, D. (2001). A molecular link between stem cell**

# regulation and floral patterning in Arabidopsis. Cell 105, 793-803.

Google Scholar: [Author Only](#) [Title Only](#) [Author and Title](#)

Long, J.A., Moan, E.I., Medford, J.I., and Barton, M.K. (1996). A member of the KNOTTED class of homeodomain proteins encoded by the STM gene of Arabidopsis. *Nature* 379, 66-69.

Google Scholar: [Author Only](#) [Title Only](#) [Author and Title](#)

Lu, S. X., Knowles, S. M., Andronis, C., Ong, M. S., and Tobin, E. M. (2009). CIRCADIAN CLOCK ASSOCIATED1 and LATE ELONGATED HYPOCOTYL function synergistically in the circadian clock of Arabidopsis. *Plant Physiol* 150(2),834–843

Google Scholar: [Author Only](#) [Title Only](#) [Author and Title](#)

Ma X, Feng F, Zhang Y, Elesawi IE, Xu K, Li T, Mei,H.,Liu,H.,Gao,N.,Chen,C., Luo, L., Yu,S. (2019) A novel rice grain size gene OsSNB was identified by genome-wide association study in natural population. *PLoS Genet* 15: e1008191.

Google Scholar: [Author Only](#) [Title Only](#) [Author and Title](#)

Maier, A.T., Stehling-Sun, S., Offenburger, S.L., and Lohmann, J.U. (2011). The bZIP Transcription Factor PERIANTHIA: A Multifunctional Hub for Meristem Control. *Front Plant Sci* 2, 79.

Google Scholar: [Author Only](#) [Title Only](#) [Author and Title](#)

Maier, A.T., Stehling-Sun, S., Wollmann, H., Demar, M., Hong, R.L., Haubeiss, S., Weigel, D., and Lohmann, J.U. (2009). Dual roles of the bZIP transcription factor PERIANTHIA in the control of floral architecture and homeotic gene expression. *Development* 136, 1613-1620.

Google Scholar: [Author Only](#) [Title Only](#) [Author and Title](#)

Ming, F., and Ma, H. (2009). A terminator of floral stem cells. *Genes Dev* 23, 1705-1708.

Google Scholar: [Author Only](#) [Title Only](#) [Author and Title](#)

Moyroud E., Tichtinsky G., Parcy F. (2009). The LEAFY floral regulators in Angiosperms: Conserved proteins with diverse roles. *J. Plant Biol.* 52: 177–185.

Google Scholar: [Author Only](#) [Title Only](#) [Author and Title](#)

Moyroud, E., Kusters, E., Monniaux, M., Koes, R., and Parcy, F. (2010). LEAFY blossoms. *Trends Plant Sci* 15, 346-352.

Google Scholar: [Author Only](#) [Title Only](#) [Author and Title](#)

Nagasawa, N., Miyoshi, M., Kitano, H., Satoh, H., and Nagato, Y. (1996). Mutations associated with floral organ number in rice. *Planta* 198, 627-633.

Google Scholar: [Author Only](#) [Title Only](#) [Author and Title](#)

Nandi, A.K., Kushalappa, K., Prasad, K., and Vijayraghavan, U. (2000). A conserved function for Arabidopsis SUPERMAN in regulating floral-whorl cell proliferation in rice, a monocotyledonous plant. *Curr Biol* 10, 215-218.

Google Scholar: [Author Only](#) [Title Only](#) [Author and Title](#)

Nijhawan, A., Jain, M., Tyagi, A.K., and Khurana, J.P. (2008). Genomic survey and gene expression analysis of the basic leucine zipper transcription factor family in rice. *Plant Physiol* 146, 333-350.

Google Scholar: [Author Only](#) [Title Only](#) [Author and Title](#)

Ohmori, Y., Tanaka, W., Kojima, M., Sakakibara, H., and Hirano, H. Y. (2013). WUSCHEL-RELATED HOMEODOMAIN4 is involved in meristem maintenance and is negatively regulated by the CLE gene FCP1 in rice. *The Plant cell*, 25(1), 229–241.

Google Scholar: [Author Only](#) [Title Only](#) [Author and Title](#)

Parcy, F., Nilsson, O., Busch, M.A., Lee, I., and Weigel, D. (1998). A genetic framework for floral patterning. *Nature* 395, 561-566.

Google Scholar: [Author Only](#) [Title Only](#) [Author and Title](#)

Pautler, M., Eveland, A.L., LaRue, T., Yang, F., Weeks, R., Lunde, C., Je, B.I., Meeley, R., Komatsu, M., Vollbrecht, E., Sakai, H., and Jackson, D. (2015). FASCIATED EAR4 encodes a bZIP transcription factor that regulates shoot meristem size in maize. *Plant Cell* 27, 104-120.

Google Scholar: [Author Only](#) [Title Only](#) [Author and Title](#)

Pautler, M., Tanaka, W., Hirano, H.Y., and Jackson, D. (2013). Grass meristems I: shoot apical meristem maintenance, axillary meristem determinacy and the floral transition. *Plant Cell Physiol* 54, 302-312.

Google Scholar: [Author Only](#) [Title Only](#) [Author and Title](#)

Prasad, K., Sriram, P., Kumar, C.S., Kushalappa, K., and Vijayraghavan, U. (2001). Ectopic expression of rice OsMADS1 reveals a role in specifying the lemma and palea, grass floral organs analogous to sepals. *Dev Genes Evol* 211, 281-290.

Google Scholar: [Author Only](#) [Title Only](#) [Author and Title](#)

Rao, N.N., Prasad, K., Kumar, P.R., and Vijayraghavan, U. (2008). Distinct regulatory role for RFL, the rice LFY homolog, in determining flowering time and plant architecture. *Proc Natl Acad Sci U S A* 105, 3646-3651.

Google Scholar: [Author Only](#) [Title Only](#) [Author and Title](#)

Ren, D., Li, Y., Zhao, F., Sang, X., Shi, J., Wang, N., Guo, S., Ling, Y., Zhang, C., Yang, Z., and He, G. (2013). MULTI-FLORET SPIKELET1, which encodes an AP2/ERF protein, determines spikelet meristem fate and sterile lemma identity in rice. *Plant Physiol* 162, 872-884.

Google Scholar: [Author Only](#) [Title Only](#) [Author and Title](#)

Running, M.P., and Meyerowitz, E.M. (1996). Mutations in the PERIANTHIA gene of Arabidopsis specifically alter floral organ number

and initiation pattern. *Development* 122, 1261-1269.

Google Scholar: [Author Only](#) [Title Only](#) [Author and Title](#)

**Sakuma, S., and Schnurbusch, T. (2019). Of floral fortune: tinkering with the grain yield**

**potential of cereal crops. *New Phytol*, 225, 1873–1882.**

Sato, H., Yoshida, K., Mitsuda, N., Ohme-Takagi, M., and Takamizo, T. (2012). Male-sterile and cleistogamous phenotypes in tall fescue induced by chimeric repressors of SUPERWOMAN1 and OsMADS58. *Plant Sci* 183, 183-189.

Google Scholar: [Author Only](#) [Title Only](#) [Author and Title](#)

Sessions, A., Nemhauser, J.L., McColl, A., Roe, J.L., Feldmann, K.A., and Zambryski, P.C. (1997). ETTIN patterns the Arabidopsis floral meristem and reproductive organs. *Development* 124, 4481-4491.

Google Scholar: [Author Only](#) [Title Only](#) [Author and Title](#)

Shigeto, J., and Tsutsumi, Y. (2016). Diverse functions and reactions of class III peroxidases. *New Phytol* 209, 1395-1402.

Google Scholar: [Author Only](#) [Title Only](#) [Author and Title](#)

Shu K, Chen Q, Wu Y, Liu R, Zhang H, Wang P, Li Y, Wang S, Tang S, Liu C, Yang W, Cao X, Serino G, Xie Q. (2016) ABI4 mediates antagonistic effects of abscisic acid and gibberellins at transcript and protein levels. *Plant J*, 85, 348-61.

Google Scholar: [Author Only](#) [Title Only](#) [Author and Title](#)

Shu K., Zhang H., Wang S., Chen M., Wu Y., Tang S., et al. (2013). ABI4 regulates primary seed dormancy by regulating the biogenesis of abscisic acid and gibberellins in Arabidopsis. *PLoS Genet* 9, e1003577.

Google Scholar: [Author Only](#) [Title Only](#) [Author and Title](#)

Somssich, M., Je, B.I., Simon, R., and Jackson, D. (2016). CLAVATA-WUSCHEL signaling in the shoot meristem. *Development* 143, 3238-3248.

Google Scholar: [Author Only](#) [Title Only](#) [Author and Title](#)

Su, Y. H., Liu, Y. B., & Zhang, X. S. (2011). Auxin-cytokinin interaction regulates meristem development. *Molecular Plant* 4(4), 616–625.

Google Scholar: [Author Only](#) [Title Only](#) [Author and Title](#)

Sun, B., Looi, L.S., Guo, S., He, Z., Gan, E.S., Huang, J., Xu, Y., Wee, W.Y., and Ito, T. (2014). Timing mechanism dependent on cell division is invoked by Polycomb eviction in plant stem cells. *Science* 343, 1248559.

Google Scholar: [Author Only](#) [Title Only](#) [Author and Title](#)

Sun, B., Xu, Y., Ng, K.H., and Ito, T. (2009). A timing mechanism for stem cell maintenance and differentiation in the Arabidopsis floral meristem. *Genes Dev* 23, 1791-1804.

Google Scholar: [Author Only](#) [Title Only](#) [Author and Title](#)

Suzaki, T., Ohneda, M., Toriba, T., Yoshida, A., and Hirano, H.Y. (2009). FON2 SPARE1 redundantly regulates floral meristem maintenance with FLORAL ORGAN NUMBER2 in rice. *PLoS Genet* 5, e1000693.

Google Scholar: [Author Only](#) [Title Only](#) [Author and Title](#)

Suzaki, T., Sato, M., Ashikari, M., Miyoshi, M., Nagato, Y., and Hirano, H.Y. (2004). The gene FLORAL ORGAN NUMBER1 regulates floral meristem size in rice and encodes a leucine-rich repeat receptor kinase orthologous to Arabidopsis CLAVATA1. *Development* 131, 5649-5657.

Google Scholar: [Author Only](#) [Title Only](#) [Author and Title](#)

Suzaki, T., Toriba, T., Fujimoto, M., Tsutsumi, N., Kitano, H., and Hirano, H.Y. (2006). Conservation and diversification of meristem maintenance mechanism in *Oryza sativa*: Function of the FLORAL ORGAN NUMBER2 gene. *Plant Cell Physiol* 47, 1591-1602.

Google Scholar: [Author Only](#) [Title Only](#) [Author and Title](#)

Taguchi-Shiobara, F., Yuan, Z., Hake, S., and Jackson, D. (2001). The fasciated ear2 gene encodes a leucine-rich repeat receptor-like protein that regulates shoot meristem proliferation in maize. *Genes Dev* 15, 2755-2766.

Google Scholar: [Author Only](#) [Title Only](#) [Author and Title](#)

Takeda, S., Hanano, K., Kariya A, Shimizu, S., Zhao L., Matsui M., Tasaka, M., Aida, M. (2011). CUP-SHAPED COTYLEDON1 transcription factor activates the expression of LSH4 and LSH3, two members of the ALOG gene family, in shoot organ boundary cells. *Plant J*, 66, 1066–1077

Google Scholar: [Author Only](#) [Title Only](#) [Author and Title](#)

Tamaki, S., Matsuo, S., Wong, H.L., Yokoi, S., and Shimamoto, K. (2007). Hd3a protein is a mobile flowering signal in rice. *Science* 316, 1033-1036.

Google Scholar: [Author Only](#) [Title Only](#) [Author and Title](#)

Tanaka, W., Pautler, M., Jackson, D., and Hirano, H.Y. (2013). Grass meristems II: inflorescence architecture, flower development and meristem fate. *Plant Cell Physiol* 54, 313-324.

Google Scholar: [Author Only](#) [Title Only](#) [Author and Title](#)

Timofejeva, L., Skibbe, D.S., Lee, S., Golubovskaya, I., Wang, R., Harper, L., Walbot, V., Cande, W.Z. (2013). Cytological Characterization and Allelism Testing of Anther Developmental Mutants Identified in a Screen of Maize Male Sterile Lines. *G3 Genes|Genomes|Genetics* 3, 231–249.

Google Scholar: [Author Only](#) [Title Only](#) [Author and Title](#)

**Tsuda, K., Ito, Y., Sato, Y., and Kurata, N. (2011). Positive autoregulation of a KNOX gene is essential for shoot apical meristem maintenance in rice. *Plant Cell* 23, 4368-4381.**

Google Scholar: [Author Only](#) [Title Only](#) [Author and Title](#)

**Tsuda, K., Kurata, N., Ohyanagi, H., and Hake, S. (2014). Genome-wide study of KNOX regulatory network reveals brassinosteroid catabolic genes important for shoot meristem function in rice. *Plant Cell* 26, 3488-3500.**

Google Scholar: [Author Only](#) [Title Only](#) [Author and Title](#)

**Tsuji, H., Tamaki, S., Komiya, R. and Shimamoto, K. (2008) Florigen and photoperiodic control of flowering in rice. *Rice* 1, 25 – 35.**

Google Scholar: [Author Only](#) [Title Only](#) [Author and Title](#)

**Vollbrecht, E., Reiser, L., and Hake, S. (2000). Shoot meristem size is dependent on inbred background and presence of the maize homeobox gene, knotted1. *Development* 127, 3161-3172.**

Google Scholar: [Author Only](#) [Title Only](#) [Author and Title](#)

**Waadt, R., Schmidt, L.K., Lohse, M., Hashimoto, K., Bock, R., and Kudla, J. (2008). Multicolor bimolecular fluorescence complementation reveals simultaneous formation of alternative CBL/CIPK complexes in planta. *Plant J* 56, 505-516.**

Google Scholar: [Author Only](#) [Title Only](#) [Author and Title](#)

**Wagner, D., Sablowski, R.W., and Meyerowitz, E.M. (1999). Transcriptional activation of APETALA1 by LEAFY. *Science* 285, 582-584.**

Google Scholar: [Author Only](#) [Title Only](#) [Author and Title](#)

**Wang, J., Wang, R., Wang, Y., Zhang, L., Zhang, L., Xu, Y., and Yao, S. (2017). Short and Solid Culm/ RFL/APO2 for culm development in rice. *Plant J* 91, 85-96.**

Google Scholar: [Author Only](#) [Title Only](#) [Author and Title](#)

**Wang, F., Han, T., Songa, Q., Yea, W., Songc, X., Chuc, J., Lic, J., and Z Jeffrey C. (2020). The rice circadian clock regulates tiller growth and panicle development through strigolactone signaling and sugar sensing. *Plant Cell* 32(10), 3124-3138**

Google Scholar: [Author Only](#) [Title Only](#) [Author and Title](#)

**Weimer, A K., Matos, J. L., Sharma, N., Patell, F., Murray, J. A., Dewitte, W., and Bergmann, D. C. (2018). Lineage-and stage-specific expressed CYCD7; 1 coordinates the single symmetric division that creates stomatal guard cells. *Development* 145,**

Google Scholar: [Author Only](#) [Title Only](#) [Author and Title](#)

**doi: 10.1242/dev.160671.**

Google Scholar: [Author Only](#) [Title Only](#) [Author and Title](#)

**Xu, W., Tao, J., Chen, M., Dreni, L., Luo, Z., Hu, Y., Liang, W., and Zhang, D. (2017). Interactions between FLORAL ORGAN NUMBER4 and floral homeotic genes in regulating rice flower development. *J Exp Bot* 68, 483-498**

Google Scholar: [Author Only](#) [Title Only](#) [Author and Title](#)

**Yaish M. W., El-Kereamy A., Zhu T., Beatty P. H., Good A. G., Bi Y. M., Rothstein, S.J. (2010). The APETALA-2-like transcription factor OsAP2-39 controls key interactions between abscisic acid and gibberellin in rice. *PLoS Genet* 6, e1001098 10.1371**

Google Scholar: [Author Only](#) [Title Only](#) [Author and Title](#)

**Yang, F., Bui, H. T., Pautler, M., Llaca, V., Johnston, R., Lee, B. H., Kolbe, A., Sakai, H., and Jackson, D. (2015). A maize glutaredoxin gene, abphyl2, regulates shoot meristem size and phyllotaxy. *Plant Cell* 27, 121–131.**

Google Scholar: [Author Only](#) [Title Only](#) [Author and Title](#)

**Yamaguchi, T., Nagasawa, N., Kawasaki, S., Matsuoka, M., Nagato, Y., and Hirano, H.Y. (2004). The YABBY gene DROOPING LEAF regulates carpel specification and midrib development in *Oryza sativa*. *Plant Cell* 16, 500-509.**

Google Scholar: [Author Only](#) [Title Only](#) [Author and Title](#)

**Yamaki, S., Nagato, Y., Kurata, N., and Nonomura, K. (2011). Ovule is a lateral organ finally differentiated from the terminating floral meristem in rice. *Dev Biol* 351, 208-216.**

Google Scholar: [Author Only](#) [Title Only](#) [Author and Title](#)

**Yang, X.C., and Hwa, C.M. (2008). Genetic modification of plant architecture and variety improvement in rice. *Heredity (Edinb)* 101, 396-404.**

Google Scholar: [Author Only](#) [Title Only](#) [Author and Title](#)

**Yoon, J., Cho, L.H., Antt, H.W., Koh, H.J., and An, G. (2017). KNOX Protein OSH15 Induces Grain Shattering by Repressing Lignin Biosynthesis Genes. *Plant Physiol* 174, 312-325.**

Google Scholar: [Author Only](#) [Title Only](#) [Author and Title](#)

**Zhang, X. (2014). Plant science. Delayed gratification--waiting to terminate stem cell identity. *Science* 343, 498-499.**

Google Scholar: [Author Only](#) [Title Only](#) [Author and Title](#)

**Zhao, Z., Andersen, S.U., Ljung, K., Dolezal, K., Miotk, A., Schultheiss, S.J., and Lohmann, J.U. (2010). Hormonal control of the shoot stem-cell niche. *Nature* 465, 1089-1092.**

Google Scholar: [Author Only](#) [Title Only](#) [Author and Title](#)

**Zhao, D.S., Li, Q.F., Zhang, C.Q. Zhang, C. Yang, Q.Q., Pan, L.X., Lu, J., Gu, M.H., Liu, Q.Q. (2018). GS9 acts as a transcriptional activator to regulate rice grain shape and appearance quality. Nat Commun 9, 1240**

Google Scholar: [Author Only](#) [Title Only](#) [Author and Title](#)

**Zhu, Y.J., Fan, Y.Y., Wang, K., Huang, D.R., Liu, W.Z., Ying, J.Z, Zhuang, J.Y. (2017). Rice Flowering Locus T 1 plays an important role in heading date influencing yield traits in rice. Sci Rep 7, 4918 doi: 10.1038/s41598-017-05302-3**

Google Scholar: [Author Only](#) [Title Only](#) [Author and Title](#)

**Zhu, Q., Zhang, X.L., Nadir, S., DongChen, W.H., Guo, X.Q., Zhang, H.X., Li, C.Y., Chen, L.J., Lee, D.S. (2017). A LysM Domain-Containing Gene OsEMSA1 Involved in Embryo sac Development in Rice (Oryza sativa L.). Front Plant Sci 8,1596-1609.**

Google Scholar: [Author Only](#) [Title Only](#) [Author and Title](#)
